# Supplementary material for: Identification of Novel Conopeptides and Distinct Gene Superfamilies in the Marine Cone Snail Conus quercinus
Source: Frontiers journal article supplement (doi:10.3389/fmars.2021.766792), 2021-11-12
Supplement: Data_Sheet_3.xlsx [file Data_Sheet_3.xlsx]

## Sheet: Table S1
Supplemental Table S1: A summary of the transcriptome assemblies of the three venom ducts
#samples		Que-1	Que-2	Que-3
Clean Reads Number		67087392	73706362	57536526
Clean Q30 Bases Rate (%)		93.2	96.52	93.21
N50	Trinity	530	395	481
	Unigene	485	374	450
N90	Trinity	225	216	220
	Unigene	223	215	218
Min	Trinity	201	201	201
	Unigene	201	201	201
Max	Trinity	15464	6544	8142
	Unigene	15464	6544	8142
Count	Trinity	134610	113063	97027
	Unigene	118589	101916	89470
Total Bases	Trinity	61618314	43016133	41785135
	Unigene	51579404	37398068	37061631
Percent GC (%)	Trinity	43.68	44.13	43.09
	Unigene	43.46	44	42.97
Mean	Trinity	457.754	380.462	430.655
	Unigene	434.943	366.95	414.235
Pair Mapping	Count	53062304	51822746	47982278
	Percent(%)	79.09	70.31	83.39

## Sheet: Table S2-1
Supplemental Table S2-1: Putative conopeptide precursors predicted with ConoSoter (Que-1). PAM:postranslational modifications; PTM pyroglu:First amino acid of mature peptide is a pyroglutamic acid; PTM gla:γ-carboxylic acids; PTM amidation:C-terminal residue amidation;PID:Alignment similarity with known sequences.
Name	Signal sequence	Pre sequence	Mature sequence	Post sequence	Cysteine Framework	Gene Superfamily	PTM pyroglu	PTM gla	PTM amidation	Closest	PID
Qc5.2 precursor; Sequence 45 from patent US 6630573.c69438_g1_1_5	MRCVPVFIILLLLSPSAPSVDA	HPMTKDDVPQASLHDDAKRTLQVPWMKR	GCCAMLTCCV	GR	V	T	N	N	Y	Qc5.2	100
c74723_g1_6_1	MHTLEMLLLLLLLLPLAPGEG	DQPVDLPALRTQDFAPEHSPWFDPVKR	CCSQDCLVCIPCCPNGSP		III	Q	N	N	N
Lt9a variant precursor.c58395_g1_2_1	MTLTKSAVLILVLLLAFDNFA	DVQPGLITMGGGRLSNLLSK	RVSIWFCASRTCSAPADCNPCTCESGVCVDWL		IX	P	N	N	N	Lt9a variant	100
c117599_g1_5_5	MSGLGTMVLTLLLLVFMVTS	HQDGGEKQATQRNAINVGRRKSITRR	TVDEECNEYCEDRNKNCCGKTNGEPRCARICL	G	VI/VII	O3	N	Y	Y
c78822_g1_1_4	MEKLTILLLVAAVLMSTQA	LIQDGGEKRQKEKIKFLSKR	KSVAESWWEGECSGWSNGCYWDSECCSGECTQGYCDLW		VI/VII	O2	N	Y	N
LtXVA precursor.c13479_g1_2_1	MEKLTILILVATVLLAIQVLVQS	DGENPVKGRVKHYAAKRFSALFRGPR	ECTTKHRRCEKDEECCPNLECKCLTSPDCQSGYKCKP		XV	O2	N	Y	N	LtXVA	100
c76164_g1_1_1	MKLTSMMIVAVLFLTAWTFVTA	VDSKNELENRGGWGQAGGWGKLFLMARNEMKNSEVSKLDNR	GTCVKDGDACVVPVAGTIFCCSGFCVFVCIGV		VI/VII	O1	N	N	N
LtVIC precursor.c94635_g1_4_1	MKLTSVVIVAVLFLAACQLTTS	DGSRGTWKDRAVRSITKVSMLR	WPCKVAGSPCGLVSECCGTCNVLRNRCV		VI/VII	O1	N	Y	N	LtVIC	100
c69573_g1_5_7	MMSKLGVLLTICLLLFPLTA	LPLDGDQPADQSAERPAERTQDDIQQHPLYDPKR	GCCVYPCLGSCRGICCYN		III	M	N	N	N
Ec3-YDG04 precursor; Qc3.1 precursor.c74753_g1_4_4	MLKMGVVLFTFLVLFPLATL	QLDADQPAARYAENKQDLNPNERKEMMLSALRQR	ACCDPDWCDAGCYDGCC		III	M	N	N	N	Qc3.1	100
Lp3.1 precursor.c61397_g1_6_1	MLKMGVLLFIFLVLFPLTTL	ELDTDRPVERHAAIKQDLKPQERRGIRLHAPR	DECCEPQWCDGACDCCS		III	M	N	Y	N	LtIIIA	100
Lt0.4 precursor.c45098_g1_3_2	MSKLGVVLFIFLVLFPMATL		QLDGDQPADRRADEKDLTQQYLNLRRVLQRGLVCAHASPYHNAVWS			M	N	N	N
c52571_g1_1_1	MGMRMMFTVFLLVVLASTVVS	FNLDHAFDGRNAAASDKASELMALAVR	GCCSHPACAGNNQDIC	G	I	A	N	N	Y	Qc1.11	93.8
Qc1.1b precursor.c78220_g2_5_2	MGMRMMFTMFLLVVLAITVVS	FTSDHASDGRNTAANDKASKLMALR	NECCDNPPCKSSNPDLCDWRS		I	A	N	Y	N	Qc1.1b	100
c100937_g1_6_1	MLPFSNSCVALVAISFWASVGA	GMLVLETSTLLVLLLSK	TAVFVCCDCC		V	?	N	N	N
c100964_g1_2_5	MLSITRSVAFTLLFFLAPPFLSAASCFSWFSSGDLSSAFCVAPPVVWSALVPSAFSPALSVCAGSSLLLPAASFLSSSPSTSMGSSFSSSPSTFSYMLAAATLKMPLPLILTFTFTLELSPLLWG		ATPLILN			?	N	N	N
c101690_g1_4_1	MVLKAFLSTNSLAVILGILPRAAVNS		CLVSCWSWFTSKCLNIAFASSLLPLKPFFRSTMTTSSRDNAPLWSLSASSKDTMNFFSCC			?	N	N	N
c102183_g1_3_1	MIIIIILSSLPSSSLLLFTLYCLVTS		LIYHQDHYNQYDHRPFAVVIVLVIYYYHFDFFSR			?	N	N	N
c102881_g1_1_3	MFLTKVLLCFCPFLPITIYC		ISITEKYKVCHSNDHIQSASQLFSSPSSGTESSVEDYKGRKSKLTYAEYKGKMERHTKESDQVQNRQRRDVKTDS			?	N	N	N
c103436_g1_3_4	MAGGPTLRLGYLAFSFSSSFCSAVFLLSWTSFVVS		PPPCSFPSLGSV			?	N	N	N
c103532_g1_4_3	MVLSALGLSIFYPPCHELMAICTCCLSCFLLRMGPFFPCVLPVLC		GPLGSYNET			?	N	N	N
c105116_g1_3_1	MSLSTFPLSSYFFFPPLIFLLQHETA		LIIFLPINYQKSELSSSTKYGVEQLKLVEYIKFSLYTYHIWIKIWLAKVHS			?	N	N	N
c106939_g1_5_1	MVVGVGQLLLLLFVVVVVIVVMVIDCCCC		RCCSWFLPLCWS			?	N	N	N
c108263_g1_1_12	MLLLLLANFPGHDTLC		FPTIAPPPAVLYHPAFSVLAVMWNPVPEPPGSSVCQSRGKQVWLQELGVKMFGSHLLPKQCTPYTVQSLSLCQPPYPKTCPPEIAPAWLPWLC		XIV	?	N	N	N
c109343_g1_6_1	MAPIGCIRCLGARAFCCLFVAFLIRRGFP		RSLFTVVSTESHADEDEGAENDDDNGSDKQGPILRETGWGSYLLLRLLNLKKCRGLL			?	N	N	N
c109732_g1_6_6	MIMSGMLFIFACLWISSLPPPPSP		LPPEECPFTSAERQLQ			?	N	N	N
c113671_g1_1_3	MEVYRSAGGLRWYRLALLTGALVLSVMEG		SVLRVTLAREEYLPWWKNRFPFLRITLFCSMRR			?	N	N	N
c113760_g1_5_1	MLDRVVPLLVPLLSLSVTAINS		SRPGAVASGPNRERSPTSQAVKSPILPSLTSKDPNGVSESDHLG			?	N	N	N
c114238_g1_4_1	MFSTSLLLSLLLPLLRLLLWPSSLFLLPSLTA	LFSSNSHFTPNMRR	YEVSCSSLSLC			?	N	N	N
c116514_g1_1_1	MPILSIPMFLSFLPHLSSLQA		RSSCSYTVSPVIGVFCSHRNICHGWKPFVHLS			?	N	N	N
c117770_g1_5_1	MMMGTAISSAAAAVGS		DNYYLHDSSAVGIFLFGTRTCFCYSESCSESYSLYYYYYSILVSCKSPSCSCCYCCWASTSVCF			?	N	N	N
c118476_g1_5_9	MKIALIFRYVTVLQVTG	QLAGDR	YMMFIPVIVMHGACLVTLFFCIDYKKEMKYQDQQLHLSKCCSLYVCHFNWLM		XVI	?	N	N	N
c118552_g1_6_3	MSALVSFLPLSLSLPFFLVAIPFLLLRSTLELTGA		DWITLFCCGAERLLGGLLGGCPCCPCMVPCRFFSLRRVALSCSFPSTAFLNLRASSSLAKFRPAAHVWPSKVWKYSLGVL			?	N	N	N
c120494_g1_1_1	MTWAWPSLIFFMDASGVTVFTCCVLCEQCRYMSLSFCFFLGQHFFFLPSLCIG		KKQKVLLTFHN			?	N	N	N
c121852_g1_1_4	MGFFLSLCTVLGVLPASS		NVISPSCNLSSSDSFCISHTMSLISQFLVLFVYEFSL			?	N	N	N
c122968_g1_1_3	MAVLIRSFPVLTGFSRPTLGLTCCLSYCCP		CPFGNKINIADA			?	N	N	N
c12329_g1_2_1	MVLLLLTVVGFLCKAMT	FIDDMPIFR	ITCFVTHPLLPSFFSLLCCQFFHDICPPILQLSFYHSVDFWQLLECMYSFFHFFEY		I	?	N	N	N
c126177_g1_5_2	MLPSFCLFFHFPLSTVFSIIPLLA		SPFNSSLLILSCCPPSSLVPSLTHIF			?	N	N	N
c126532_g1_5_2	MGLGGEFHLVMCCAFLCSA		MINRRSPLDGRVLHMLSPLLGV			?	N	N	N
c126708_g1_4_1	MWAPDVRPQVLPVLSPGGASAPEVTSPLLTRSRLLLFVSSLSLLAA		VHHQHDADMTRVALLHQRCFVFPPPFRSALIF			?	N	N	N
c127224_g1_3_4	MAMHTHLLKITIFKGFFFFFPSLSLPLLLSPPLSC		NTTHIKIPFSPHLS			?	N	N	N
c127617_g1_3_2	MSWFGPNEVPFVVVLTLTSPGHS	RSGTQASPMWASLSWRPTWTLWAPLKSPRR	CHGFRCSPPSTNITLWKPGKNLLPPIRMPSSMWRPVPA			?	N	N	N
c128111_g1_2_16	MILLILPVFVCLLCCMLFICVCLC		FKCLETFLLRFPSSTGPFSCLFWKLDTFFFLPSKLTVINDMPAFLF			?	N	N	N
c128987_g1_5_2	MVWSIPLPRCGASLWKFWTGLMSCCCCLVTWVRHMVVLSSG		EFCLPVAFELLISSVHPLSAGEALQLGTGAALPAHGVQNHVLGLAAHA			?	N	N	N
c129198_g1_5_1	MHLISGLAAISLTSL	IFWELKPR	ASISSSFHVCSETLPAVSTQPVHCWDRRDRHC			?	N	N	N
c129912_g1_6_1	MFVVPAIVCWCAAARPSG	SPVPDPTAAVSSAWEHHRHGR	PTSHQSPGVSLVLIVSRSSFSALGWLFLLDVLTAEKCPQWELTTPGGEASSC			?	N	N	N
c130493_g1_5_2	MLIPILRSLFVRVLLLHIIS	FDRER	VSFTWLKCLKSFVCVVQCEVT			?	N	N	N
c131040_g1_1_1	MPRLQPLLLLSYKSVLLVFIVQKMVVIPFIIPPAAA		IVIVIAGHPRGTRGSGWQ			?	N	N	N
c132286_g1_1_1	MGAAAERVWMGVEGGRETLATMVGRVWAWLTLMMAGCCL		MYWCSS			?	N	N	N
c13778_g1_4_5	MTALYTLILVPFFRCLLFQTLLYSLPKALLALASLLSSSLSILA		SDVMVHPR			?	N	N	N
c14726_g1_3_2	MWSGILVQVLASAPNFDWLPSHQSILA		LICCHEGCLSVLKRPCMRLVEL		I	?	N	N	N
c14932_g1_6_9	MPCPSFQPIFLSSLIPMGSLSGTMRSVRA		AEAGRMESLVADTTSACLFRLRVSDENVSDVAYWRGAIPCSPKSSSSIKSSGCCAVASCFC		VI/VII	?	N	N	N
c15210_g1_5_2	MPSLVPTYCACPPPPATALLVLFRSRAAA		SSRTSMCVPTRTQGTWGARERISRIQASWACLRESGDSTEKQT	RKTSLLT		?	N	N	N
c15368_g1_2_7	MILRKVLFKVFYATIVWQGAHS		GNVFIFLIIQNSITTRCEENLWSAEKVSVVWLWVVMCCFLFCGGRREGMRCVLCNFLQDRQKDALTRVYMTKHLKIGQTIC		IV	?	N	N	N
c1574_g1_4_3	MQCLFIFVLLFFICSFTALHHQGIRSALG		SFCPAALSDEWPMF			?	N	N	N
c16143_g1_5_1	MGPPFSSLMPSVTILFLLLSSDLGVSA		SPLAILLDGGLTSRLLARGGLMSGVLEGGLTSGVLPAL			?	N	N	N
c1675_g1_5_3	MVLGSDISFIFTPLTLSFIPTAIA		GFIFCQLHFRNDKFLFLPIFLSGCWKPSPCIFTSNFINHCECPSMLCFKSCVQIFIIHIYWP		IX	?	N	N	N
c17863_g1_2_3	MFSFTLFQCVIYVSLQFVML		HMNSQIALKLIPQILPGTTAVFIGPRNLFLAWCCVPCQTLFKLWPVHFVLLSLTCPLFIEEKRLYLCGFCAFLGIWYNLESMFSAF		IV	?	N	N	N
c18363_g1_1_10	MTMIRMGFFLMLTVAVLLTSLTCIDG	APAENVKLKSAR	DDCSWDCVTCDPDLPCGCCGNVICHSNGVCQLVSDPYNYYGSYY		XII	?	N	N	N
c18422_g2_5_1	MACCIGWCALLRWLATLFLWRPVLP		SCLPNVWLWRLCANCVYTVTMWTSSLPPHRSHASCCSWGGS		XIV	?	N	N	N
c18821_g1_5_5	MAKMLLALTLRLLLGLTALWCSAAA		WTVCVEDIGLVTPTFSCCCRSSSALDGTNGTCCCCCCWC			?	N	N	N
c18821_g1_6_4	MALTAHAAVAVAGADG		KFDWPPAISAPAPAGSWLVAAGSWMTSSGCLPCHPPRACRRWCRDCWLREE	RRD	XIV	?	N	N	N
c19756_g1_4_1	MLSSASEAACIPSPFIWGPLPSLLAAPHLTLP		RKHCTAVRGNMALVYSTCSCARSCIGL		XIV	?	N	N	N
c22493_g1_6_1	MILIVIVSSLYFPPILT		SLLKQTHYCGWTAWDEKTQKNQSTQ			?	N	N	N
c25076_g1_3_1	MCIFLVCVHHLLRVCFVVFVLFCSLKCDLFCFFAGLICVSFS		QPIFMLVFYISLPVYRSICVYLSIFLSIHRES			?	N	N	N
c25295_g1_2_4	MTGNETFSAVSILLGFIVFPLFSNLCCG		QNFPCSLTFTQRFHF			?	N	N	N
c26577_g1_1_2	MVQPLLLPPATLAVTMCSLPSAAS		LHRSGAGGITQLRRSVDLRH			?	N	N	N
c27116_g1_3_5	MHVCLLISFPSLVYVLS		LFHPMVRMNGNKTGSTVNENGLRQAECISSPKALALFKK			?	N	N	N
c27131_g1_2_2	MAFALALVYGLTLACAPALACGLA		QVYGLVLILATQDHLECPLPRLIFCPI			?	Y	N	N
c27146_g1_4_9	MSPYYHAALLSFFFSFLSA		YFLNYPSRFSFFKFLAMENSFVVSGPFTCTL			?	N	N	N
c27700_g1_1_1	MTTRMTKAWAAAVLPFPSYP		ALRRRFPSHHPTPHFHPHPTRHKAWIKC			?	N	N	N
c28282_g1_3_2	MLPFQVSYLFRIILLASISPFFRIIML		APVSPLFRIILQAPVSPFFRINLTSQMSYLFRIILPAYNSMFFSIILPS			?	N	N	N
c28716_g1_6_6	MRLPARLYFGSPVIVDFLTA		FEFGLLITCCRFMCMCKRHVTRGTLCTVLKEESDHHTFCLTHSDVL	RTIYFFFIPEFTLFSLQ	IV	?	N	N	N
c28720_g1_1_1	MSNPVVLILIHLASLSFVCFCGG		FLFVFWGVPPFSSNNSTTFSCCLLNLILFCIIL			?	N	N	N
c28846_g1_5_1	MIIFTAALMLTGMPPSASA		CVHGDVFNLYEYTNSWADYSLLVLIYDVF			?	N	N	N
c36725_g1_1_4	MCVSMLFGVIFVCGHSLA		FLCFFLYESSFSAKYSGREFPQQIPSFTRHTSS			?	N	N	N
c3799_g1_1_1	MHWQHFVFFPFFIAILFCYCLCVTWA		CTSNMFFFPSLFCCHHPCRLTGTDCTHAILSGSLSTATAPCPQPGSSYHSHGTNNPERVSNVQWS		XXVII	?	N	N	N
c41658_g1_3_4	MINLFALRLLASSAVIFG		VECPFSIHVWCHEFSNVVSWTSRSAFWATLSSCEESLESPPIATTRPFWGSPSTSPGLT			?	N	N	N
c4217_g1_1_10	MFWAALIFLSFKKPGLALTAWPISLAAWASPSACTTFCCFSCLAFSTRNWARWASCWA		TCLDSTAAVYSRPKLSSVMETSSKMRLKSLARSVSSRRINSDTCWRCVIN			?	N	N	N
c42408_g1_3_9	MPSPFSCLILLPPLPITIWYFTLFSNLSLIHLAIS		SPSSQSVSILGAPCILHVMMHKVPFKTTLLASVNPLKLKNSSESSSAEHIIVCCISPLITCFVSPITVKSEEKHSIS		XXIV	?	N	N	N
c42698_g1_5_2	MKIPCPGALPSLPSLTMSAA	RSGHR	HPEGGLPLDLGCPVSGLYRLSLTGVEVYSFCCCNAWIWPLNLFENCSEWRRQPQCLAVQNCQ		II	?	N	N	N
c42753_g1_2_4	MYGFIVGAFLFDDQVVEA	QPSERYMRDR	TKFSWVLVSNLVEFYVTVHQIKVQEHCRGYCGILNFSLVRISILPCVVQVHLQVTTKMGINKTKKDNLQIWCCRVWQCA		XXIII	?	N	N	N
c43831_g1_3_4	MCCFLIIVYFVCDIVLS	INVNDRVFRKKKNYHGLTGR	LKTLSLCCVLCIHSTSLSHITRCGTYRITDSVLKLLPQQTI		I	?	N	N	N
c4534_g1_4_2	MLSMVTVKVVFTLFPLSLS		LTPSPRILLLVIFRTLNTRNWEMEVGRDDG			?	N	N	N
c45608_g2_5_3	MLGMLFSVAAWHPLHC		WLSGHLTSHGSPPDKHTQLDAFGMDL			?	N	N	N
c46906_g1_4_2	MKHLPMHIIIYIFLLPPIHLPAHITHT		APYHQSSTHLASHISHVSHTGR			?	N	N	N
c46939_g1_2_1	MGIGQLLCNIIFIALQCSVVQG		GHEESILFYSKLPCMIILFSWLLCCKGIQCSGVKLTVVVKGRVSRVSN		XXIV	?	N	N	N
c48541_g1_3_7	MQKATVLILAILLLLPLSTA	QDDEGSQENAAER	ELAGTTDCGGTGESCGGSDDPDCCGLQKCVSGKCCPTTDAC	GR	XVII	?	N	N	Y
c48542_g1_3_3	MHLLFWIFLILFPPLPRL		EENERQGWREGNGDKTLTSEVIFSQHCSSIGTGYSAHE			?	N	N	N
c48689_g1_3_6	MYGRCSLSLIPFPLSLSLLPPPPSSFS		AHSFPISSISVTPIPLLLPPFLSSAHHPSPPLIMTERSKRYTERRWSSLTFLLLP			?	N	N	N
c49335_g1_5_3	MATEMSLAMTITPLAMS		IPVTIFLFFMSPTADHTSLSIPLTISSSILCCTGRCQLKTY			?	N	N	N
c50161_g1_5_9	MCMPYICVQIILLVAEVSFC		EGLAHLKLNKYMLDSLAQLVCFLSCLVSLFCPVDYFVLGRWFCYVLDCPAKHSAVIETLVASKLSIHQ		XIV	?	N	N	N
c51349_g1_1_2	MLWLFLVLCVVFYLHDYVIT	VFLFSIHRRRTGHPPIALSYDR	SGVVFLCC			?	N	N	N
c51450_g1_4_4	MANQMILIILFVGG	QDMIFYTSTPKR	NQKPPCNKRLSVVCTQKTYKMKTHVTLAYGLACGE			?	N	N	N
c52007_g1_5_3	MAADILSLSLICLLISSA		VWWVPSLIKISTLNFSGNVFSIFLRRLRPMMEAREQWGTVGTNSMVTSVWPAGRRVTLTPSSLTTFSSSSVSGFSGS			?	N	N	N
c52443_g1_4_3	MKISLIICLLLIAFMNG	DGSPGNTMYSRRSAGVAAAIKRFQKNFLR	KSCNNCPEEPCCAGDQCMPDPGYEPFCGN		VI/VII	?	N	Y	N
c53648_g1_6_4	MNCLQLLLVLLLISAIAALHG	DGRVPQRRGRNIR	TTSNLLNFQTRDCPSSCPAVCPNQNECCDGDVCNYSNTLNKYFCIGCGSGGGE		XIII	?	N	N	N
c53686_g1_4_7	MLGLPFTSFLATLVTSA	EVMPSTRLMRSAVLR	ICSLPRACSARSLSTASAPSLYMQIWAFSCFLAVSTSFSAKPVLVTAANWLKAARRTFSTSLACAIA		XIV	?	N	N	N
c5395_g2_1_8	MSSWVAWIYSLIPFLMLSNMRMA	RLGRGFLGTLGDLRR	AWKPCAALEPDPWCREWTEGRVPRFMD			?	N	N	N
c55952_g1_1_1	MRILLTFHIGVFLLVFHTGIFL	THFSRR	CIFISHLSHSCIFTRLSHRCIFFSPFAQVHFFNSPFKQVCFYFSPFTQMYFHSPFTPVVFSSRFTQVDFYSPFTQVAFYYLSH	R	XIV	?	N	N	N
c56042_g1_4_6	MALEWFVMVAVLSFSFCSFSCSLS	EYILHIAISLASWAEEGPGSR	CEWLVGTVHIPPSSHPVLHTQCSETCRSPLTHTRSSTSPHQGYPPSWA			?	N	N	N
c56404_g1_4_8	MLICLYAFLKSFTPIFMASTVVFVSLQVWIA		KFCCSRLKDCWFN			?	N	N	N
c56516_g1_4_6	MVYFLSLPEPTFAFAVPLTFFCLFFLSLRCFLPALFTSTNPCLA		SLYLGSKRLAFSGVS			?	N	N	N
c5727_g1_5_3	MVLYFDLFVIIIFFCCLHLLCFVSG		VTPMSRVPDPSHTATPKLT			?	N	N	N
c58443_g1_4_1	MLDTCSRLGPVPGDIAAAGGACAVCTSPSAEG		TSVCCSKYTVCCSTAPLAVTVTAAGVV		V	?	N	N	N
c58875_g1_6_6	MVGRTSVSFLLFSIMILGMVATVIC		SCEERISSEKCEAPGERICSCSNHVCCQLSAAKKDQCMTPFMCRTASGGN	RRRRSTQVQDRFLRMARGLAD	XII	?	N	N	N
c59297_g1_4_14	MIKILGYITISALILPITT		HTVMFAMNILQVTPAISLSSNPLSRYHCPVI			?	N	N	N
c59933_g1_1_2	MVPIISVLVALVLGRCYQFCSLIRLLWFCCSVSSCIA		SVLEEKLFAANSHPLNKIKGDA			?	N	N	N
c61236_g1_2_5	MAGVGRAVEQMVPSLPLTPSAAWVGLSFG		SSVPSGPLPSLHLSLDCP			?	N	N	N
c61339_g1_4_1	MGHLPSLPWNLPQQQLVFLAAIQSFFSWA		FKVSTDGLLLLQTGTTHCTLSKCL			?	N	N	N
c61524_g2_4_1	MAMNVWMTISVLVVVVMATAVTG	STPSQEQERSSVDRTKK	SCCAMKTYECLRDRDCLISQDSDCATPCKNIDTSGCDSADGNDCCASYMDCVVDCQIDTGSDVEDPLAVCYNSCNSAHSC			?	N	Y	N
c61573_g1_6_1	MLLIHLYLAISLPLFITLLLYYSKYVLL		LCCYYWCINVTKILVC		I	?	N	N	N
c61697_g1_6_2	MPAWYLPVAMPWAPVSVAMSTMVSHFKSFWAYATPSPRTSLPSASVLLISTVLP		EYILTMSSGRWASGPTAFSARQKTACRFSLKPSLTAL			?	N	N	N
c61769_g2_6_2	MGRFGLLGSVVFPLYKAISLSYLCLSLAAISS		KGFFLVSCISLHFAEHSLVNSAIFEIDLPALLASSRQ			?	N	N	N
c61770_g1_2_4	MFGCCCFFFHVFFVDIVFQ		LYYSFNAIQLSVGCKATAVLQSDMNSFQVLNRCCKANCRNTEQHLSVTETEQHVLHGSLTSNADICEELSIPVSPLKYDCQAALVFCCSLREISHPTAASNHTLKHRHAGRCYNQAS			?	N	N	N
c62470_g1_2_3	MSTLPFRTFSLLLLLLLLMKGRG		AGLVVGGGGGGVGWWWWCCCCCRQGSREE	R		?	N	N	N
c62513_g1_2_1	MSMFVPFTVPWLYVSVVCFLSSA		GDMTLCKQWTVRKVDASSSVY			?	N	N	N
c62613_g1_5_7	MAMISINGFLRILGKLRA		APPDFLPDCFFCPNNLTVWPFKVSSTTSTTRSICCTPTTLRPCMYGAL	G	XVI	?	N	N	Y
c63150_g1_3_5	MILCFNISYFIFFPSLAFS		HPCITYTLPVSAIFTLKKYFQERRRQLYIISLLSLFYL			?	N	N	N
c63915_g1_4_1	MIVALQLVLSTPGALLMCLLSG		HVWRPGKGGGLTISFPILSKPASVATVPGMTLFISFSAQMYGLWIP			?	N	N	N
c64140_g1_2_1	MTLFLCPSLLHLILG		DPLPLSFPSLSSLCLFILGLFVFKTIHFSCLFPSFLVSFFYPVLKNESFPCPSLLCLS		XIV	?	N	N	N
c64396_g1_4_1	MGTGGQRLGPAVSSLGFAVSGIGCVTA	DR	YSLVFVIIPIQDLIHLSCLQQGDVCSQGVHSESHGVQRFPLVQRDQTSPH			?	N	N	N
c64538_g1_1_6	MLSLCPFPTSLFIVFFPLLFLPLPLFLPSALFLSPPLLVSFNRASS		LHYGYEHFFVIVFV			?	N	N	N
c65055_g1_3_7	MPPNPLSALSWREWSVLLPVCPRKGSATVVISVAWSTASA		PGTPLRIISSCLFSSSWRFMSISFSICSCFSFICRCCSAEEGGPLWTPPTATGVEVVPLGTGLHICCCCGGEES			?	N	N	N
c65087_g1_1_7	MARNGYGILTLTFFLPWIFIELAKISDG		TYDFPIHPTATHGLTTGSDAPTAASP			?	N	N	N
c65816_g1_4_10	MEYPHAIPIPRSLGALLCCWFLSKKWS		LSFYQVIQTLHLTCCLKECFERFVKACLSIRAVTLAFVVEIRKWQLCLD	K	I	?	N	N	N
c65832_g1_3_9	MLCLPIFIILLLLVSPAAT	LRVQSKLER	FLTQQSPRDFAKSIMQLLHDNWIDCCHDGDCC		V	?	N	N	N
c66112_g1_2_10	MPFFSALWLLSWARA		GHFRLNNFKVCEQVIDVLIEMCSTPTSLLKF			?	N	N	N
c66296_g1_4_3	MFFIGFFSQIIQVPMFILFFFLCISISWS	RIIITVER	KAACCSRKSCFCNLMYLCVRFVCICMSQDRLQFSRIC	G		?	N	N	Y
c66587_g1_3_1	MGGATTLVGVVRPSPRFRLGGTVVCCVCIPGTP		LPPPLIRECRDLPSEVRSSCSLRALLNTSSTQCDQSECSEVTEWTSAVTTPRPCFLRIWSCTADLRTPPAVFLV		IX	?	N	N	N
c66608_g1_3_3	MEIFVAFNSSVYFKVVFFSLLSVLLSKSFC		CCCCFKLFDSMFHVT			?	N	N	N
c66888_g1_1_14	MVYSFIAIMILTCHFTDFLFVCCCC		HFHVHNTDYLKCVDRSRKPASANTISGNVKSVSVSVSVLCKHGINEGCGILADASTEHARD	RRV		?	N	N	N
c67035_g1_1_1	MKFLLMLFTGCCPNTVFFMFVFFFLSRDGPEFVST		QTCFLFCENFGFTVVCSLSAHNYCRWFGNRYVFLDF		XIV	?	Y	N	N
c67213_g1_4_4	MWPLTNAPTAISLRAALASLFTPLSLPLGPTLC		CSWRVWCSPKVLGRVTPRL			?	N	N	N
c67397_g1_2_15	MASRMFLFMSSIFIFLSSAPNPLTC		NIFICFTIVDFPDSPAPNSRRRCVALYNCLSFCSCFSMRLFASFRILSSSSSFFRKHPMLSRIVAILASLEGLRHTNAATGNPQGRKDSICPHH		IX	?	N	N	N
c67773_g1_1_3	MSILLICTSPVPLSPPPPILP		LPPTFPVFSSPEIPHLISLAAR			?	N	N	N
c68107_g2_3_4	MTIHMFPVSVLCVIVIVTPHFP		IPPRIARHDVTEKPFNKECPNKDQAWIFF			?	N	N	N
c68229_g1_6_14	MRKPGHIILLGVGILISLPRETES		EFRTALLCIPSSPFPCLPLPVCLLGAFGLKQTVCFPFCLF	RR	XIV	?	N	N	N
c68499_g1_4_3	MRNLAVFLCLLAIVGLSSA	YWIDGLYGNQLYDDEEAARMFSEHKR	RDLTKSQDLCIPWRAPCPSDAKLSERYPFLRCCSGLSCRCTFWGNNCKCESRL	GR	XV	?	N	Y	Y
c68604_g1_2_8	MFVYPMTLRSLSQLFFVCFFLFDILNHKCHC		RSSVAFRLSPSPNFPVYFPFLSALD			?	N	N	N
c68650_g1_2_7	MPFLLRFFPLVQPPFLLMGSPSSAPS		DKPTPAACSDPTPLKSAWPVAPRKPASVANPDSTVRSVVSLATSSSRL			?	N	N	N
c68689_g2_6_7	MRHALYFFFSLLLIFFFKQMVDS		DIFLSSESRTVSTNFTAADYFLNITKFCYNFYIEINYFGREKS			?	N	N	N
c68711_g1_1_3	MGCFPSRLLAFFNKSLIAIFFPLVCLA		DIVFVRHSEFHQVHLFLFLTPYHQIWLLRCWDGEETLAAL			?	N	N	N
c68823_g1_3_4	MAAFRRVISWGLLSAGILQPDFRALG		RSLMVFMSVIESKESC			?	N	N	N
c69916_g1_1_12	MVAAVFCAVVVVVDA		DDGGSLLCCCCCCKVIKMECNDFLILRGFSYSYYSAILFFD			?	N	N	N
c70094_g1_5_1	MAVRYTLLSPRLVVGGLTVVLLSLGVMQVQA		AMWGSHGPCPPGIGAGEKWNPKDAFCSECRCQDSGRGYICYSCGLAMDQGPAGCHVIDQFPNRPYPHCCKKALVCPGEPTH			?	N	N	N
c70192_g1_6_11	MNGSPSRTLIRIMVLFPLVLLALSSVYWSAFVALSAA		YTPRPNMALSLAMRVSRPWSWIA			?	N	N	N
c70195_g1_6_6	MDPSLPPPPPSAGPAPPRRSSQVFSTAWVLWAHVES		WGSFSTESSSG			?	N	N	N
c70475_g1_3_9	MALGFFSALSKLFTTRVLAVVCLEMARSCRS		STVGSDCLAQGSSSTVRPSVSALLSGRGILMKASMSPTEGMKSGMKGFSLWSSSMD			?	N	N	N
c71154_g1_1_1	MLLLPPRLVPTLLHLPKVLT		SLELPSPPSTLGPIAPTVPLLCSSSGPPSQETHHQHSRRQAGCSCLARQLPLPTAVLPPQHSLPPVLRPASGLLPLRTTSTLGLVTGPEKSRELYVEQCANDDRFCSRHGNSCCPCVKCCS			?	N	N	N
c71330_g1_3_2	MLPGFPGTWWCSVLVPVLIHWTQG		HPSSLPGTDGSQRLLMETV			?	N	N	N
c71359_g1_2_18	MPILPCLLCLSFYINMISCIITSDA		QPMETHVSRIEGKRKQGPLHNIDRRSVFRILTVLNILLLFSCHAVPHTVNSESDTFISYSRYFYKLTSK			?	N	N	N
c71568_g1_1_11	MMLILLTLLCQSLP		SPHPPPPRTCVLTDMKIFIRTVGLNRFMQNNQK			?	N	N	N
c71778_g1_6_1	MDFCFCYLAICMVIIPRSLA		KVFGAFCRPCQTRTPWVSGAWTSPTWTNGAGCSSSTASPSSSPPSPLSTRPLTPATPTALTTPSSCCSRSCRLPSTTC	RRTRPRPTGSSPAQ	VI/VII	?	N	N	N
c72004_g1_1_19	MGVHPSLRAALTVLGKSAG		LEPKGLMLNVTLRPLQSGPPKNIAEVKGIRQTATRDTFPSIVQELSSFL			?	N	N	N
c72271_g4_1_6	MRLKSMIFFRILGLVSYLHGLGSS	NNTPHTIFNQVYLRLVLR	HCLTFLSLSVVAIKGSVTACGYKRSESPVKRAVSCTLHSCGDKAVFTNWDGDFFKSWSLYPFNAKETPLQQCCYISV		XXV	?	N	N	N
c72346_g3_4_2	MMGYFCSALFWPTSLPIICLWLPQART		SLTPPILPSLLYPLLLSLIPSVQILTPVFAFR			?	N	N	N
c72543_g1_1_12	MAILPICSAILGGPSFRIALCLYVFIMVKTVCA		EGDGLTVTDSYISMCVRSLVYES			?	N	N	N
c73114_g1_5_1	MVTELRQLLLLLLPLLGSLDP		FLPQGGDFSSLPFPLFSPRFFVLRHFLFLSFQFGPLPLFHGPFGFITSSSGLPFLGKLCRG			?	N	N	N
c73309_g1_3_71	MYMPEMNFSYLCLPALIECLSTCLS		KSVVMKSKQPSSPNAPHSVLISISGGPGSLPSAISTLSSFSM			?	N	N	N
c73311_g1_2_9	MPLFMAVWVPLILGTFRKPGLHP		AIQPPGNVSLGILCSPPSLRARAP			?	N	N	N
c73453_g1_2_5	MDLPHFPITCLLALLLGNLETLRSACSA		ETSQFPEKTRFYLHLVRYLHGNHLLSP			?	N	N	N
c73884_g2_4_15	MWGEMLILTPLHLGHS		YEMGSCIFTAHPAAMAAPSTDLFYLNGQEVRRRWWK			?	N	N	N
c73939_g2_4_3	MYLVQGIWASLKHPFFGDVSLFVLCTLCCHICWA		IWCCKQHFFRVVDIYLFSCGSKGYPTCLLFKNFRVFLIQISSLIRMTCTSAFYGEMRIIN		I	?	N	N	N
c74180_g2_5_6	MHGQVFFPLILVPSLSCTFPRNHHFLLLIIFIPLASA		GHQHRFTGLMATSG			?	N	N	N
c74261_g2_3_13	MFMVWSAPKRGCVVLMVRNVLACSLVQFCVCCLVEVCLG		CVPVERHAGIIQVYCSLHFPIGYTTLEKTNY			?	N	N	N
c74285_g3_1_3	MAAALSCLFLLYRVQG		MPAEDSVANNLFQYHTVNVGEGPYPSLRDWLASV			?	N	N	N
c74345_g1_2_3	MAWFCIRLSVCLPFLPFPLGAS		QSLHPFYPSTSLTLPPQHS			?	N	N	N
c74626_g2_5_2	MSSGSAFPFGLYSFFYCPIFHPLSMASLFCNSLWFHLTRPHLCLSCHSSVTG		SPREATDIGFPEGNPPEMLHKCKVTLMVFHGACYGSKFSLIRPVMKMNWGFPSALISVHVLAV			?	N	N	N
c74821_g1_2_16	MVMVVSALSLDPNLT	APLPFLTSTTHRPSFPPAPFTLKAYTPFIFFTMLLPSSSSRLAISLKRAADLKSLSEGPELVR	DAWICRPMVSGKPCW			?	N	N	N
c74857_g1_6_3	MYAPTPPSLAVDVGAPPPAAAACASSPSPSRA		HDASARRAHVAAVPLPS			?	N	N	N
c74868_g1_2_3	MFVFLFSVAMAITIFNHHALLT		IPLSILFPFLFFLFPAYLTPRGR			?	N	N	N
c74985_g1_4_5	MFIFILDFITKSGLKALFLLILTPPPLPS		THPPYLCVCGSTFPHPLPVFCISLFLSNLE			?	N	N	N
c75116_g1_2_13	MQWHLLNLPILPALAYINSLAIMLWIVCRA		DMCLLLLFQNRTFFHHCMETVLKRILCRHQ	R		?	N	N	N
c75249_g1_2_9	MVGRLFPWPLAVVVHPPPRSTSSRLLHLLWQLCCPWRCCCRRWVLAVAPPLWASALT		GPPPPQTPSPHSASPHEI			?	N	N	N
c75357_g1_2_7	MAAQWVWISLSFIIITPCLS		HSAPLSLHRPRTDLNAVIPMLHSTHLQDSAIILRSLAVRGQSRNERRHRYPS			?	N	N	N
c75364_g2_6_2	MGTTFLEESPMVLIGMMFLEGCRT		TTTCTATVLRSPWSCRAASTLSLPSSPRNGRTTKRLCCPTWRRCTLGSMVLSRIKQRARE		XVI	?	N	N	N
c75413_g1_2_4	MVALGMVAYAVMSFVVNHRVLA	EERRR	EEKDLTVLHSQRDGWEAGPYQKPCRPTLNVNYWGGVFCVCFLTECSHTNLIIFFTALDKHLKQGNWLFCFVFNLP		XIV	?	N	N	N
c75436_g1_3_26	MGMVLSLYHCLAFLSLCLPVSS	SSFGSGDFRFGARVSFGALEFWVGSDPER	CEERCVLLVICSQ	KKKALQHKIFPTAAVIYQWTIADKLPVRTNTYSQG		?	N	Y	N
c75453_g1_5_3	MGPPTILLRPSTTALLPLTLIPVRWISS		RQPLGVQGMMHWSRSPRDKRPALL			?	N	N	N
c75532_g2_4_1	MVVLCSVFELITHNLFVALVPLFLLSCKLLLFLVCFQLAYLAGTFKLSSLPRLHPVTSLCPSLPRTLPHASSFCLAFLLSLTFSFHVSSPFLLLPPWLPPSHC		LSLCSVLTRLRC			?	N	N	N
c75997_g1_4_4	MRTIRALASFLHPLLP		LSPPPPCNKNNNKQTNSGQLKRIFFQIIIYPWHTCCINYTQAFREGRDELLFVLLHMVVSVEIEVLGVLDDDDGTGAVVDEIVADGSHESSTDSPQPP			?	N	N	N
c76034_g1_4_11	MPGLKLLISGCLASRWVTWWTLQVSSTSTWA		WTSGSSGLLHWWSGRCCTACA			?	N	N	N
c76353_g1_4_10	MFSRQLLLYFLSFFFFPLLA		SDITFKVTCVCFQLFSPVLCDVVYYCSMVYGVVLWYGVLRRSGVLTLRCMLYRTGLLRDTQCCIRLCGRLHFTALY	R		?	N	N	N
c76525_g1_3_9	MDATFAWMPPAIRGPPTATVWCDESGRWLCCMVLCAVQVVWKGVLS		MLREESCVGG			?	N	N	N
c76587_g1_1_4	METCGLLGTWILWAGTGGG		FDQCFLCFFTFYSSIPSAFPLFSTPPPLPSAPFIRTCARNHVHVLLAAKRVEGRNICCFF		XIV	?	N	N	N
c76901_g1_1_2	MVLFVTGTFSSIVWPLAPVSLA		GVGIALTSVLHNFIRKGRTSVTPSLTSLKASEVMAAIMRTEATITGSSRGMDRAPLSIC			?	N	N	N
c76960_g1_5_1	MLKNGAMMRFNIKWPIWIVTATLLICNKCQC		CEDCLCVSNEGQRLSIAQSSRMRMDNTKLMPNN			?	N	N	N
c77059_g2_6_2	MVTLCKWFFFPLIFLLFENFIFFSSL		YFSNFCHMCTTYGKLYA			?	N	N	N
c77098_g1_4_3	MVIKHVIIVVRVIPVWPPLCMPVSALPLSRVHVSWA		FLPSLCHSLYRCQSYQARSVSCKLDVIFNLLWTFFIFEAFKFSIDLPATGS			?	N	N	N
c77204_g4_5_3	MFRSSPSPPFSVFVLPFLLLGSVPPPPSSP		HYPSTLPRIMFI			?	N	N	N
c77307_g1_6_6	MVSVLLVHGSLGWSVHFIFPYSHFKSMEGIKPSSSLLHMMCIFRINRLLAWLLCFVFFSSHG		TECTNFVLCEGAACLMTVTSLSFHVRII			?	N	N	N
c77464_g1_3_9	MMVLRSRWLLPILSALCMSLSRRLMSMMKSFSLSCCSTMLTSLACS	EFVKK	LSTCWLTGDFVLCVSSGGLYLAACLSAKP	RKDRNFS		?	N	N	N
c77746_g3_6_8	MAMLGAIMLGLVMPIVCEVIDA		AELTPIGLPIPACCACCIMGMCPGCTDPWEAMMDCPWGTIMMP		XXVII	?	N	N	N
c77751_g1_3_17	MFRAILLSFVLVQHC		LDVLVEFCPLSILLYNQFGGLGGMGSRMT			?	N	N	N
c77947_g2_3_8	MPCIFLLMVIWFFSLSP		DFYNYMKVCPSWRVSPSLTRAVDCNDLYLKCLKSCISCGSRIRHFVLVFGVLHIHEHV		XIV	?	N	N	N
c77971_g1_5_9	MPNSNSALALLILFTALLWVYRQ		FVCVYKCIINVYFECVFCMYILKSCWCCTKYFCAIIVSAYKTTIPNFVCTLPEVLHTALLKNCKEVNSMHLSFSVLPIFVLFITKLE	K		?	N	N	N
c77974_g1_6_3	MAISLPSLGCLPFDICYG		EAVFVINRSFPYDFVIESLIPTDNKKPHAGTQS			?	N	N	N
c78051_g1_1_58	MLWSLAKLISMATPCLVMMSLQILAWSLS		SPNLCSFTSLKRLSTIGTVKT			?	N	N	N
c78122_g1_1_6	MRPGPAEEGTQLLLLLQLLLSGEDVVAVA		FCCSSCSCFFSSALASLESTCTSLVILISSPAKSNTLVMVIFPLLLPLD		I	?	N	N	N
c78194_g1_4_9	MTTAACMVVSGFLSAAGTILA		NTGTRLLNLQLAKTLARIRNQTITLTPL			?	N	N	N
c78340_g4_4_10	MFNLYFGFFSATSAVHFTLLVTVLLTIASITHT		QMMCFGQHISIFYLMG			?	N	N	N
c78405_g1_6_45	MLSVSVVGEALVTSPLLPAGPLSSA		GVKESSDVRSSSKPQAL			?	N	N	N
c78531_g1_1_12	MAGGPAFFRLGYLAFSFSSSICSAVFSGTCFSLLSLSCSFSGSLSSTSVG		DVPSSDAIFVDHQPSY			?	N	N	N
c78648_g1_2_18	MGVLCCQVFACLCVCAFAPMMFGMHVHLSMCCMSVQVPVDA		CSYFNCFVTVVQERN			?	N	N	N
c78792_g1_5_1	MKIVLIALLFVALVVAPTRA		GPDGPGHYYPSYGGHGYGHGGGYGYGRGYGYGYGHGYNHGHYRRNHYGYYKRYHQDYYH			?	N	N	N
c78927_g2_4_4	MGFPVFLLPSSTAAVTPFSTTYG		LSCYCCFCYCYFYCCYFYYCYFYYCYLSYCYFYRYFCYCTWTYICSSFVRINLLCFHKSFVFSPFLFSRPA			?	N	N	N
c78975_g3_1_14	MIPRGVPSFPLTGRVFLPPNLWTTSMSPVSTFTCSLSRNSASTFFSHCSAVSSLLPLVSS		AIPKILRLFLLM			?	N	N	N
c78975_g3_4_15	MLKFFYFAALVECADIPGTNG		YFFRWQHIKSFTVLDMTMPFLPSAIN			?	N	N	N
c78989_g3_4_2	MLVLVLILFSFLYMHLPSS	EQPYRRKNNKKK	WHVCVCVCDISVQCCCCCCCKVICLAFVWDFRVKSSTHDPENRQGKIFMMVSGLIH			?	N	N	N
c79036_g2_2_11	MYFCCFSASCMPVQYMWPAFCAGLSWLLVTASVLSSLG		FTLGPFNSCDLLVCYRCFFPPFPSTVIN	KRHFHSAFIFPYIMAA		?	N	N	N
c79037_g2_5_10	MPFILVPNTQPHAGALCSLFFASSQQEA		MRLPVTVRSSTRRGPARLSHGWIDLYSVSIYCDLTRNGFASRVLVVGY			?	N	N	N
c79066_g1_6_24	MRRSASFRAILPGGVLMIPLSAA		IPRSMRNASTRLAPSTNRNVRSATLA			?	N	N	N
c79070_g1_6_30	MLRVKDFILLCPLTALMWPIAVGLA		LSNIVPLKYPLFVLTLVCLCSPPLPLPIPLPFCF			?	N	N	N
c79121_g1_3_28	MGVTVPTSVTLALVMPSIPPARS		SSTLGRLASGPCSASLSLNIASPVFSSFLLATLSSLKALPIFSAADWHLASTSWGRCKLRAIRGDNSGMGSS	G		?	N	N	Y
c79179_g1_3_12	MLRPRMLFHCLPVQILHGALEWQWTNWGWWPTRLMASSPLTMAGSTWS	SRR	PSLPMCCASCVATV			?	N	N	N
c7919_g1_4_1	MPPCLPPAWIPARPWVPGRKEFMAMRRSTSSLLRTGFFFSFSPDSLS	LDLSRPLEELR	GTPACTCLEITAASTNSCPFPSLSGESVGSWSDRLMLVNPSEDLCVATPAST	GKR	XIV	?	N	N	Y
c79254_g1_3_30	MHQIPLILIVFLYFAHC		FDNIHHFLQKSQQIELRKKAVSMISLSAEY			?	N	N	N
c79258_g1_3_9	MPFHLASLILAPLAFLFLCNKSCT		HRQLICCVIACFICSI		I	?	N	N	N
c79371_g2_2_6	MPDILMEAATWLYWLMSTMAPSSSVWMSLSHWMRASTLA		LSTPSIVRSSSSLSPLRLVVGGGKPMKGGMKNGMDGPKGGGAAAEALALAEAEVLVVVVVVVAEEAVAPPVPGAPACCGGCPMAWPGRPPGCIGGQPKGNPPNP		I	?	N	N	N
c79524_g1_6_3	MAPPPPTALSSLLIGAHHGMTGVAS		LLSQSSEWKTHSDPEA			?	N	N	N
c79543_g1_4_23	MQLLFLYMPNTAALAFIVLALARPKVLA	LALR	SACCCCCSCDL	G		?	N	N	Y
c79545_g2_6_42	MLVAAVGSLLCWTFYYCSVSC		CSKHGCLWNSENCGTVRPASVHILDVFPFASLLL			?	N	N	N
c79567_g3_1_22	MLFVEVGILLTQGRQLFLRGVQA		AECSQNVLNTLVFLLLGLHGCCFAVWLRLGFRRLSSYHGSLSCARPPCFLGRTCCSFLCRFWRLA			?	N	N	N
c79593_g1_1_2	MFIEPQEVGRLRSFGGVGILPLLGLAFLAGTFTHCLCRLALLLLLLPLFLLLLLSLPFPPLFS		RRVVALRARSSRVVGVGVPGGRGGGVAVILLCHLTSTVARVERLI			?	N	N	N
c79663_g1_4_4	MSLPFLLPSLIPSLPPPILP	PPLLSSK	SLTIGRINFTSETCTSDHSLVAIGSFTCAERMLHVSHQKD			?	N	N	N
c79698_g2_6_2	MSPPLKSPLMPPIFFTIWANFLYWVRSSLTSRA	DTPDPRATLWTRPGHRVNSFSPSRLSSSASFMLSMMVIRRLRR	AIESCSVPLVMKSELKPGIMPMIWLKGPIFMMFWNCSYMSLREN			?	N	Y	N
c80117_g1_1_16	MIIVSMVTIIVVFIVSPPPISFT		TFPPLPTLCFPPSTPSPFPPIPSPLPVSFPMPFNKSPSIPHPLVNSFILVNFVLSELFSSELFSATQQQ			?	N	N	N
c80212_g1_1_5	MYTLHTVFIFHLFLFVLPLHP		LPPPPSLFLGGRVWVGKVELINTRSYVDRRTFILLSLVSGNFFFNGEQDNQSLTGIDSRQPPAYTS			?	N	N	N
c80229_g2_3_12	MLCGFVDLGVCVLDAPWPCLS		TCCPPFQADGQCCVLMIWCFLAYIVWLSKPVVLPVAIVEVCPVYCFMWILYLTAHGHPTILFCSSPLIPCPQFFFSCWLFCF			?	N	N	N
c80241_g2_1_2	MRMKMMLWISVPVLRLHG	RANTLYAYFFHHVIPASSRPGR	CRHLPCWSGNEEQHSQRDSSIKWMKKSTVAVPVFPAEPPYSRLDRLWVRRRSGQ	KKSRVGI		?	N	N	N
c80247_g2_5_1	MNLLLLFFLFFFLIIHHDDAIYVATVTLLFLLFLLAAGVCC		FPCFLPVRGRAFITVTHLSFVPIRLHFRATVLPIWCV			?	N	N	N
c80264_g1_1_20	MEIFFSRLVMFFSIPVFPSNATA		MYSFCITTSSPFMGVTSFCCFLAFLSLLRDTRKVVNPRGTKLAGKTSSNLEVSPFLSGMRNVSGDSGITSEATCCPSGPLTVKPTSCSDDT	GRRT		?	N	N	Y
c80274_g1_2_26	MTGPFSLWAVFLAAKS		TPPDNTIYSCLSGFARSLGWSLDVLVHICFYCCYYICVAKSI		XVI	?	N	N	N
c80290_g3_3_1	MPPRTIVLLLLTITALCQG		IHYLPNWESIDSRPLPSWYDESKLGIFIHWGVFSVPSYSSEWFWWAWKGQQNPAVRQFMIDNYRPDFTYADFAQDFTAEFFQANSFAQSFA			?	N	N	N
c80290_g3_6_1	MPPRTIVLLLLTITALCQG		IHYLPNWESIDSRPLPSWYDESKLGIFIHWGVFSVPSYSSEWFWWAWKGQQNPAVRQFMIDNYRPDFTYADFAQDFTAEFFQANDWAKLFA			?	N	N	N
c80298_g1_5_19	MACTLFCLNTLLIFFTILALFCMPFSRP		AKLESISNRSCVKYPPCHHLLLEQRSITEACVGV			?	N	N	N
c80408_g6_4_2	MRSAEIPIPLVCPPPATG	RPDGSTESRGSR	CPGEGCPQGTRTETAHTV			?	N	Y	N
c80480_g1_5_26	MLPNPVSTTLLICLGGGAAVAPSSLA		FPPSPSALAAGGGAVPVLSPAAGVASFSGILSGEGEIWNSGRQGGQTRQGLVKKAFSSVCPADKGEN			?	N	N	N
c80616_g2_2_2	MSAAVLGLTVAVTVSA		ASLCILRSLPEYRRDRWSSNRALRASTSCCSSTVSSPAVAATASEALFFPAISSLSIRA	RKS		?	N	N	N
c80634_g1_2_5	MTDAHWPAPALGAPYTLSGLSSFRNCAAISAASSCSSSWA		ASIISSAICCLRCCLVSSVYAL		V	?	N	N	N
c80644_g1_4_6	MMTLFSCPLSSALMGWFLLTSHC		SSTMYLYTYSPLGRSMVAENTSPFFIRAIFSPQSLKEPLTWTVSPPSSHVNSALCTLFPGSSAS			?	N	N	N
c80679_g5_6_4	MFLLCSILPHFLLTFIPFSSSALPPLPCLSLSLCLPLSSFLLSCCFS		CMVLFESFERHTGQ			?	N	N	N
c80706_g6_3_11	MIFNITNVFGFLTFLLFPPLILP		FLSIHPLPSYLSSGMFLGDCGIDDFVSQKYFVVHWCLFFRERIRP			?	N	N	N
c80729_g2_6_25	MVALVPILTSLFLQFSQFEWDPNFWSVFLCEC		IFDVSRIVSPGVINAIMVSLVIDMLRTLTQI			?	N	N	N
c80744_g7_4_8	MFSLSVYMFCLHIEGLMFFCCLFCFGFSHS		STWLFLFPLFM			?	N	N	N
c80747_g5_1_31	MGSLTRALSLEPTGALLAPGRG		FRLRFLMLPVFQPDFSMIPFIFKQGK			?	N	N	N
c80798_g1_3_48	MWLLFVSFYVVFLFLVEQ		SNPIYFLIPTIHCLQAVFQVFCSPLPSPSPSPHFSALICCLTAVPVPLSHSVESCTMKAYCTDKSSFPSFFIMLLVYIIGA		VI/VII	?	N	N	N
c80964_g1_1_6	MVMLALPSPISFLAVTLYCPPSSL		VKLSTSSFRVYLLPSSVTVGTRRALGTSTVVPFIQVMAGLGLAVHWQLMMMFLPLASCDTLGFSVKVGATPPGGLAFSPPAKLSVMLALDSPKSLAAVHLYVPPSSPLGSEI			?	N	N	N
c81066_g1_3_2	MYVMYVFVHFICSLSSA		FFPVPLSRKLKPSLFSLFCFLLRFI			?	N	N	N
c81089_g1_3_4	MYMSMYLLLELFLFFLSAQGVCC		TEHLCDVCLMSARLYYPPPPFPSLSEVYMLTS			?	N	N	N
c81428_g1_4_3	MILLVVMLLPVYLLFASSFQ		ENTKLFGFFCCFYCLFFVVVVVTL			?	N	N	N
c81496_g1_5_1	MSMLLLVVNESVWHLLPVFVISLTSLASL		SNLPMYQYYSM			?	N	N	N
c8234_g1_1_4	MVVCVIIFFPDTLLLACLFCGESFS		DAFCSFSRTENRYIRQVMLRKYHYFLFYDGAVCLMLKTNFSSCGALSVFEIIPLL			?	N	N	N
c82356_g1_5_2	MHVVCCPIFCSLVAA		VHIFATANMGITALQESGQRMLKNGKSLGC			?	N	N	N
c83020_g1_4_1	MASVMGTIMAVVAVLLIHMDRNHVDS		IRPSINQRGSDPTSSRIRRAMRRWRFHRSMATAIISPPRNSISRSRM			?	N	N	N
c84044_g1_2_1	MRCLAFLVVTLLLFTAMATTGA	SDRVNAAANAKASDSISPAVR	DECCPNPSCRQNHPELCS		I	?	N	Y	N
c84299_g1_3_1	MLIFLQSWRIRLALVCLFIYKCSFS		IDYTITWLLKQIMLTMFINMKTWH			?	N	N	N
c84416_g1_3_2	MGHWHLCVVWSSGFLSAAIL		EDTRYSGAVIFSSAAVCKRL			?	N	N	N
c85996_g1_5_6	MPFSKLNLFFFFPITPSLPSHT		VPCVYMCVPLHSSNFISWLHSLN	K		?	N	N	N
c86309_g1_3_1	MPPFFVDIFSLMPFCCFFMCVSLLSLMAPLTDA		ASGERYTTSPSSRLLFFLFRRFLHLADVLPPLSLVCLFFTLEALFL			?	N	N	N
c87790_g1_6_2	MFMFFRLFCCLLLCFFHSFFIHC		IFQPIMMDVDTWEVRSDIILLI			?	N	N	N
c88215_g1_2_1	MGAYALPWMLALRGVDWA	EDPPPSPPSTELVLSLRLRVRGLLTELQLSVRVNLGPVREPLSLR	AGLGPSAGLALSEGTSLEITKASSTLAATTLLETLLLSIDLASELCDAFSAAMVLFCESFWTLEVGLGGTWGGAV			?	N	Y	N
c88876_g1_1_1	MSWMLELRLMLPGCSPWLICMASCSSMICCAAC		SRGTWMWDTMLGRRRQSLMARLLLIST			?	N	N	N
c90339_g1_4_5	MPRVGEGLPDWAGLVISGLLGSLTRLHT		IEPSGPHPSVLLFSPPSPSFSTACSTVN			?	N	N	N
c90927_g1_1_1	MEKLAILLLVAAILMLTQA	LIQDGEKHQRMKTHFLSKR	KSVVESWWEGECSGWSVYCVNDWECCSGECGGYYCELW		VI/VII	?	N	Y	N
c91140_g1_2_6	MASGSSPAGPALSAPAASSAHCSHS		SHTQSVSNGPNCSRHQESLASASALFCMKLWLLECCQNPCV		XVI	?	N	N	N
c92062_g1_1_6	MWLLLLFFLNFFFQLILRIDL		SRLFFLSPSFSPTTTLPPTLIPCMYK			?	N	N	N
c92162_g1_2_1	MALYVIVYLLLLVCCA	WMKDMLKK	LCIPPPQLFQLHQLQRCFFTSTPSDCTLLPIVLAVFLITLRL			?	N	N	N
c92826_g1_6_7	MLYVGVFCSVVFGLQAMLC		HNLYSFWMPYTSAIIHLVCVGACYLSCPVCLNECPSVVSMCAIIPSSESVCT		IX	?	N	N	N
c93479_g1_5_1	MGEGWAAIMIVLLILVSSVTRG		AECCILCSHRSAEWSGIHMFDHICQTFVCTNTCT		IV	?	N	N	N
c95017_g1_4_1	MMMPTMIATLWNRVICFLSATCSLPSTLG		TFSLPMVLVVVMAIPWSWCQHSYKL			?	N	N	N
c9556_g1_3_6	MKLTGVLIISVLLLTASQLITA	DYSRDKRQYLAMRLRDGMRNFRGVR	DCGEQGEGCRTRPCCSGLSCIGTHAGGLCQPE		VI/VII	?	N	Y	N

## Sheet: Table S2-2
Supplemental Table S2-2: Putative conopeptide precursors predicted with ConoSoter (Que-2).PAM:postranslational modifications; PTM pyroglu:First amino acid of mature peptide is a pyroglutamic acid; PTM gla:γ-carboxylic acids; PTM amidation:C-terminal residue amidation.PID:Alignment similarity with known sequences.
Name	Signal sequence	Pre sequence	Mature sequence	Post sequence	Cysteine Framework	Gene Superfamily	PTM pyroglu	PTM gla	PTM amidation	Closest	PID
Mr5.1b precursor.c62833_g4_3_1	MRCLPVFVILLLLIASAPSVDA	RLKTKDDMPLPSSHANIKRTLQMLRNK	RCCPGWELCCEWDDGW		V	T	N	Y	N	Mr5.1b	100
c62833_g5_3_2	MRCVPVFIILLLLSPSAPSVDA	HPMTKDDVPQASLHDDAKRTLQVPWMKR	GCCARLTCCV	GR	V	T	N	N	Y	Qc5.1	100
c36712_g1_4_4	MSGLGTMVLTLLLLVFMVTS	HQDGGEKQATQRNAINVGRRKSITRR	TVDEECNEYCEDRNKNCCGKTNGEPKCARICL	G	VI/VII	O3	N	Y	Y
c63837_g2_3_3	MEKLTILLLVAAVLMSTQA	LIQDGGEKRQKEKIKFLSKR	KSVAESWWEGECRGWSNGCSQHSQCCSGECIGRYCDIW		VI/VII	O2	N	Y	N
c94437_g1_2_1	MEKLTILVLVAAVLLSAQVMVQG	DGDQPADRDAVPRDDNPGGTSGKFMNVLRRS	GCPWDPWC	G		O2	N	N	Y	Contryphan-Lo	100
c59918_g2_1_1	MKLTCMMIVALLFLTAWTFVTA	VDSKNELENRGGWGQAGGWGKLFPMARDEMKNSDVSKLDNR	GRCGKDGDACVFPVVGSVFCCSGVCVFVCIGF		VI/VII	O1	N	N	N
G6.2 precursor.c59918_g1_1_2	MKLTCMMIVAVLFLTAWTFVTA	VPHSSDVLENLYLKALHETENHEASKLNVR	DDECEPPGDFCGFFKIGPPCCSGWCFLWCA		VI/VII	O1	N	N	N	MaIr137	100
c20951_g1_6_1	MKLTCVLIIAVLFLTASQLVTA	DYTRDKWQYPAASLRDGMWNLRHTR	ACSQVGEACFPQKPCCPGFLCNHIGGMCHH		VI/VII	O1	N	Y	N
LtVIC precursor.c48115_g1_1_1	MKLTSVVIVAVLFLAACQLTTS	DGSRGTWKDRAVRSITKVSMLR	WPCKVAGSPCGLVSECCGTCNVLRNRCV		VI/VII	O1	N	Y	N	LtVIC	100
Mr15.3 precursor.c45725_g1_5_7	MSTLKMMLLILLLLLPMATFDSDGQA	IPGGGIPSAVNSRVRGDEKSGRSLEKR	CRSGKTCPRVGPDECCERSDCFCKMVPARPYWRNKCICL		XV	N	N	Y	N	Mr15.3	100
LtIIIA precursor.c93327_g1_6_1	MLKMGVLLFTFLVLFPLTTL	ELDTDRPVERHAAIKQDLKPQERRGIRLHAPR	DECCEPQWCDGACDCCS		III	M	N	Y	N	LtIIIA	100
c61991_g1_1_3	MLKMGVVLFTFLVLFPLATL	QLDADQPVARYAENKQDFNPNERMKTMLSALRQR	GCCDPQWCDAGCYDGCC		III	M	N	N	N	Qc3-YDG01	100
conomarphin-Mr1 precursor.c82717_g1_3_2	MSKLGVVLCIFLVLFPMATL		QLDGDQTADRHADQRGQDLTEQQRNSKRVLKKRDWEYHAHPKPNSFWTLV			M	N	N	N
Mr11.2 precursor.c61388_g1_1_2	MKLSVTFLLILVILPSVTG	EKSSERTLSGAALRDK	WGTCSLLGKGCRHHSDCCWDLCCTGKTCVMTVLPCHFFPL		XI	I1	N	N	N	Mr11.2	100
c63954_g1_6_4	MQRGAVLLGVVAFLALWPQAAA	RVYDLNEPDVWGMVDYAQR	AMHSCAIVNDYDDRRWSSYNVAEFKDRSLFRTMVTDLQGCLNYFFQIRP			F	N	N	N
c52366_g1_4_11	MGMRMIFTVFLLLALATTVAS	FTLDRASNGRDAAADSKAADQIAQTVR	DECCSNPSCAQTHPEIC	RRTLMLQNPLNHDMSPSA	I	A	N	Y	N	Qc1.16	100
c58343_g1_2_2	MGMRMMFTMFLLVVLATTVVS	FTSDHASDGRNTAANDKASDLMALR	DGCCSNPSCSVNNPDICGG	GR	I	A	N	N	Y	Qc1.18	94.7
c8871_g1_2_3	MAAALSCLFLLYRVQG		MPAEDSVANNLFQYHTVNVGEGPYPSLRDWLASV			?	N	N	N
c51100_g1_5_3	MAADILSLSLICLLISSA		VWWVPSLIKISTLNFSGNVFSIFLRRLRPMMEAREQWGTVGTNSMVTSVWPAGRRVTLTPSSLTTFSSSSVSGFSGS			?	N	N	N
c56001_g1_3_10	MAAFRVISWGLLSAGILQPDFRALG		RSLMVFMSVIESKESC			?	N	N	N
c60195_g4_6_2	MAAPALLGFVPLLQPSPQSLS		HFCIILACLSHRGISMTKEFTVAAITVFALLLVVGGRGGGGFLRAAIINAVTVVIMVRLTIWICAECRCPYADVVDSGGEGR	G	XIV	?	N	N	Y
c38419_g1_3_3	MAASPWWSLTRVNSLVLGIYSGGTDHPAHG		TAWFLFCCCCSLCRGPRPRACGLYIPPPALNPPATPANVQLHTPAPRPTVDGAYILLSLT			?	N	N	N
c57741_g1_4_4	MAFALALVYGLTLACAPALACGLA		QVYGLVLILATQDHLECPLPRLIFCPI			?	Y	N	N
c30080_g1_3_4	MAGGPTLRLGYLAFSFSSSFCSAVFLLSWTSFVVS		PPPCSFPSLGSV			?	N	N	N
c98693_g1_1_1	MAGVGRAVEHMVPSLPLTPSAAWVGLSFG		SSVPSGPLPSLHLSLDCP			?	N	N	N
c91684_g1_5_2	MAISKALIASLLISLLVLQLVQA	DVENSQKKNGYAKK	IDCGSACVARCRLSRRPRLCHRACGTCCYRCNCVPPGTYGNYDKCQCYASLTTHGGRRKCP			?	N	N	N
c103729_g1_3_4	MALAALAILGQRSAHS		FPIGPVIAEPFISPLGLTMTPALSSKYMKTPSFRRHGLRCLTMTAGRTFFLRSGLPFLTVAITMSPTQAEGNRLRRPLIPFTEMM			?	N	N	N
c62200_g1_1_6	MALGFFSALSKLFTTRVLAVVCLEMARSCRS		STVGSDCLAQGSSSTVRPSVSALLSGRGILMKASMSPTEGMKSGMKGFSLWSSSMD			?	N	N	N
c109581_g1_2_7	MAMISINGFLRILGKLRA		APPDFLPDCFFCPNNLTVWPFKVSSTTSTTRSICCTPTTLRPCMYGAL	G	XVI	?	N	N	Y
c63827_g3_6_2	MAMLGAIMLGLVMPIVCEVIDA		AELTPIGLPIPACCACCIMGICPGCTDPWEAMMDCPWGTIMMP		XXVII	?	N	N	N
c19299_g2_2_1	MAMNVWMTISVLVVVVMATAVTG	STPSQEQERSSVDRTKK	SCCAMKTYECLRDRDCLISQDSDCATPCKNIDTSGCDSADGNDCCASYMDCVVDCQIDTGSDVEDPLAVCYNSCNSAHSC			?	N	Y	N
c79439_g1_6_3	MAVGDFISMWLVSMLSGSVS		LVFPPGFLPSTTKAVAGSIPLS			?	N	N	N
c55121_g2_4_2	MCAGIFSSAYSFPVFLVFGLSNYVCLYHSSFG		QILPCYVFVGTCAA			?	Y	N	N
c114906_g1_3_3	MCCFLIIIYFVCDIVLS	INVNDRVFRKKKNYHGLTGR	LKTLSLCCVLCIH			?	N	N	N
c48265_g1_5_1	MCGWLCSWCRLLLGFVVGWC		RFTTLTVDDTLCLSKKLLLLQILKCWLIFISIVLITRCSIIWRCCVDVCCKRNRGGGGGKIVEHCISTKGE			?	N	N	N
c46212_g1_4_8	MCMPYICVQIILLVAEVSFC		EGLAHLKLNKYMLDSLAQLVCFLSCLVSLFCPVDYFVLGRWFCYVPDCPAKHSAVIETLVASKLSIHQ		XIV	?	N	N	N
c73401_g1_5_3	MCTNSMFLLLLHLFVLFMRIQFSFPWHLVISCCCCCCWWLFLSNEISGTSLHVCLSTKIFFFLAFNYQLLLPNGCSG		TEMCLR			?	N	N	N
c68928_g1_6_1	MCVAVVLPVWCCGICGGVWILFSIRLVST		FVWFLFLSPSEEVLGYHSLILVLLSVD			?	N	N	N
c62975_g2_4_13	MCVCVVLFLWNGISLLVILPFCCQ		QSFGTTSIFIFLFQHLQQPKEKKEFENSLSHISPSRSIQFSDWTIQEPPPPSLL			?	N	N	N
c60376_g1_1_9	MDATFAWMPPAIRGPPTATVWCDESGRWLCCMVLCAVQVVWKGVLS		MLREESCVGG			?	N	N	N
c20096_g1_1_2	MDIGGEGRFCFLFVPLSPHLRSLTPVAFHFVCCCCA		RVCVKIFLSFNATCLRLYFLFCFCKGDGEGH	K	XIV	?	N	N	N
c64142_g1_2_8	MDISPVQIALNATSILGLPADSVCLA		SRMPDHSQALLGGDTPCCHRVRLRCAVVSRRWEKKRMESSSIDRRLCACCPVICYHRQSFC			?	N	N	N
c62196_g1_4_11	MDLKKTINILLLCFPLYLFLFPCCCP		ILCMLLKSAQHFLTM			?	N	N	N
c14825_g1_2_4	MDRSVLPWWWSALSLMNVMVFFSFSSPFLSLLNTLTLTTIHLISFSLA		AHSNSLCTQIKVLNIERFGSFPSTSFLYLRMGYTSMSIRQ			?	N	N	N
c63837_g3_2_3	MEKLAILLLAAAILMLTQA	LIQDGEKHQRMKTHFLSKR	KSVVESWWEGECSGWSVYCVNDWECCSGECGGSYCELW		VI/VII	?	N	Y	N
c40001_g1_6_1	MELRLAVLAGALAFTPPWKIKA		NLCEPLVGYVFLGLTYESCCDLSRCGSVQ		XXIV	?	N	N	N
c48252_g1_2_6	MEVYRSAGGLRWYRLALLTGALVLSVMEG		SVLRVTLAREEYLPWWKNRFPFLRITLFCSMRR			?	N	N	N
c86374_g1_3_3	MFFFFFPLVIICCFYLCAFRCAVVSG	YDGR	IHSLWGVMGRYTLCKLFLSQKVENKNQNQKFDVCTCTSHLN			?	N	N	N
c18703_g1_4_2	MFMFHLSFSILMLMRG		FFMSQNSVVRNMAEEHSVLLNSLPLHAHTYVTICNSNPVNTYLKTYLFKQSFILRTTLYTSAFLFFKPGFVSDINVCVHVCVSGKEGEGSNLWQGLCVGMSKSDTNCECGNWTKCAWKIIFIILTCHA		XXII	?	N	N	N
c63049_g2_5_4	MFRAILLSFVLVQHC		LDVLVEFCPLSILLYNQFGGLGGMGSRMT			?	N	N	N
c30896_g1_3_5	MFRSSPSPPFSVFVLPFLLLGSVPPPPSSP		HYPSTLPRIMFI			?	N	N	N
c26137_g1_2_9	MFWAALIFLSFKKPGLALTAWPISLAAWASPSACTTFCCFSCLAFSTRNWARWASCWA		TCLDSTAAVYSRPKLSSVMETSSKMRLKSLARSVSSRRINSDTCWRCVIN			?	N	N	N
c39424_g2_6_1	MGFTAPHLWRRAHALLPPTPPSPRRTRSTTGPPTSLTAPAAPAPAHP	SPLPRER	PGSCPTFLLCPTPRRQIRAPASRPCLRGEEVLGVAPGVPQSQQL			?	N	N	N
c43519_g1_2_2	MGILPAAMRRLLIVPFLRNSARG		TSSESVSSSLLHLGLIEAKDTSESDDSSRVEDRTGWIIRACIMSF			?	N	N	N
c19266_g2_4_2	MGRFGLLGSVVFPLYKAISLSYLCLSLAAISS		KGFFLVSCISLHFAEHSLVNSAIFEIDLPALLASSRQ			?	N	N	N
c92089_g1_1_2	MGSFVVVFVCVMFLQIA		DHLYIRKNPLSGTHVLLSSVRGRDFLNFQPPNPHPLLRPPRLSLPSLPSHPFLLAGRPAL			?	N	N	N
c35947_g1_6_4	MGSLTRALSLEPTGALLAPGRG		FRLRFLMLPVFQPDFSMIPFIFKQGK			?	N	N	N
c73832_g1_5_2	MGTMKAALFLLLVLALGTIGVSG	EDGQTMQGKNPSDTYIRAVRRSAGKHR	SNVCAGLESCSNSCCHVGRRCQCLKIRCEQ		VI/VII	?	N	Y	N
c64693_g1_2_16	MGTTFLEESPMVLIGMMFLEGCRT		TTTCTATVLRSPWSCRAASTLSLPSSPRNGRTTKRLCCPTWRRCTLGSMVLSRIRQRARE		XVI	?	N	N	N
c52507_g1_5_8	MGVHPSLRAALTVLGKSAG		LEPKGLMLNVTLRPLQSGPPKNIAEVKGIRQTATRDTFPSIVQELSSFL			?	N	N	N
c51665_g1_5_9	MGVLCCQVFACLCVCAFAPMMFG		MYVHFSMCCMSVQVPVDACSYFNCFVTVVQERN		I	?	N	N	N
c62667_g2_1_15	MHGQVFFPLILVPSLSCTFPRNHHFLLLIIFIPLASA		GHQHRFTGLMATSG			?	N	N	N
c5651_g1_4_2	MIEFYQNLPLGSLGALATATQFASWVPACVS		KQCTLSHILHSNSRTLSSVATLAQQQLIQSTRAIGHPRIATDLGGDGRRDLFIDQSFPFTGG			?	N	N	N
c63872_g1_4_29	MIFNITNVFGFLTFLLFPPLILP		FLSIHPLPSYLSSGMFLGDCGIDDFVSQKYFVVHWCLFFRERIRP			?	N	N	N
c56580_g1_4_4	MIFVFVRLVFVVLVFILSKFCSVCFFVLWVLSFNSFIAFLLWSLVCSLNCLLLKTPLYRVSSVMHLLLFFFLLFFLIIHHDDAIYVATVTLLFLLFLLAAGVCC		FPCFLPVRGRAFITVTHLSFVPIRLHFRATVLPIWCV			?	N	N	N
c48417_g1_2_1	MIISPSALAAAGPFMFEGSCWP		SSKDVEFVVKCSMFESHSSPMENEQDNFSFYFIFV			?	N	N	N
c67796_g1_5_2	MILLILPVFVCLLCCMLFICVCLC		FKCLETFLLRFPSSTGPFSCLFWKLDTFFFLPSKLTVINDMPAFLF			?	N	N	N
c43379_g1_4_4	MILLMEISREASMSLMILLWRSMGRRSMLSAREIHLRSHGLILELIMLLSLPVYS		PPCQRLHPI			?	N	N	N
c40577_g1_5_3	MIMIMIIMLIITIIIISSSSSG		ISFFLVPIPTRTKCGSDRLGPTEHQSYYQSILVIHIFLNFSS			?	N	N	N
c96192_g1_1_3	MINLFALRLLASSAVIFG		VECPFSIHVWCHEFSNVVSWTSRSAFWATLSSCEESLESPPIATTRPFWGSPSTSPGLT			?	N	N	N
c87342_g1_1_2	MIRHFVAICFSNIGYA		VPDLTCVVSVSPAIQFNPDPEIVIPSAYSIWPQIHRNEELAPFFSSAEICDIC	K		?	N	N	N
c40818_g1_2_6	MIRMGFFLMLTVAVLLTSLTCTDG	APAENVKLKSAR	DDCSWDCVTCDPDLPCGCCGNVICHSNGVCQLVSDPYNYYGSYY		XII	?	N	N	N
c64155_g4_1_1	MIVALQLVLSTPGALLMCLLSG		HVWRPGKGGGLTISFPILSKPASVATVPGRTLFISFSAQMYGLWIP			?	N	N	N
c116367_g1_4_1	MKCKIIVLKVELFFFCIPFPFFSATSL		NPYHLGFISRKENKFRQ			?	N	N	N
c27336_g1_5_2	MKHLPMHIIIYIFLLPPIHLPAHITHT		APYHQSSTHLASHISHVSHTGR			?	N	N	N
c82941_g1_4_9	MKIALIFRYVTVLQVTG	QLAGDR	YMMFIPVIVMHGACLVTLFFCIDYKKEMKYQDQQLHLSKCCSLYVCHFNWLM		XVI	?	N	N	N
c61314_g1_5_3	MKISLIICLLLIAFMNG	DGSPGNTMYSRRSAGVAAAIKRFQKNFLKK	SCNNCPEEPCCAGDQCMPDPGYEPFCGN		VI/VII	?	N	Y	N
c104804_g1_4_2	MKLLIVDYILHYLLCTLLISIIFTSTA		KHESDDWGLKTKLYLSVLIRHY			?	N	N	N
c59926_g1_3_6	MKLTGVLIISVLLLTASQLITA	DYSRDKRQYLAMRLRDGMRNFRGVR	DCGEQGEGCYTRPCCSGLTCVGTQVGGLCQPE		VI/VII	?	N	Y	N
c100998_g1_4_3	MKMFIYISVALLHPPRLLSVLLSLSPLPPHPSSTLS		HSHCRTVSVTPSSPKINTD			?	N	N	N
c56018_g1_6_1	MKTALLFLGLVAVAVASA	SSNRQAPRSHGDPLHNLVR	QEVKFLKQHDPTLDVTGCTDQCDAIFDLGSPHNEHLLDNLCYSEC	KKAFHGHHGHPTSTPAPSTT	XIV	?	Y	Y	N
c48070_g1_1_2	MLAAWFSVIPVAMSIGSLKMALGFFSATSSMS		TPPSGLPTMTGPPKPRSIKMAK			?	N	N	N
c108341_g1_5_1	MLAFTAAEPVGVVCLGIASLQG	LSIPFLFPLDVEVDIVHKQLREFPQLFRR	NSVSLFFLLCLLFHLKGVLRKERSEDPLVSLFAVLALARSVGEHLPTYFAKPTPRTVPLNCCPGPCTWWPFEE		XXIV	?	N	N	N
c68288_g1_2_1	MLAHRSPTAPVFLFFMPFLPELSLT		STIFVLFFIELWPHAEPAGRSPHSAPSPRCLALAPGLALPSNADELAGVKPEEST			?	N	N	N
c60759_g1_4_3	MLFASILDVLVLFLFCYSCNDHFTDCLA		LHICCHKCSCKLMERCNIQLYAVGNFSFFSLSALAWVINNKTTLYSCLWVPGL	K	IV	?	N	N	N
c58402_g1_1_12	MLFLLRFFPLVQPPFLLMGSPSSAPS		DKPTPAACSDPTPLKSAWPVAPRKPASVANPDSTVRSVVSLATSSSRL			?	N	N	N
c51080_g1_3_2	MLFSFLLSYLEYHIARFSIVISGVCCIAIRGVCC		LVFYFHTWSIMLRGFPLSCREVLAMFSTAQYKTWVMCNAYTQEVCMLFLQCLSSVQLLSVCEGVN		XIV	?	N	N	N
c38755_g1_2_4	MLFVAIILSLKILVLFIPLPSASFC		TYFVAPVTSNYTLVFFRKR			?	N	N	N
c42478_g1_4_7	MLGLPFTSFLATLVTSA	EVMPSTRLMRSAVLR	ICSLPRACSARSLSTASAPSLYMQIWAFSCFLAVSTSFSAKPVLVTAANWLKAARRTFSTSLACAIA		XIV	?	N	N	N
c63913_g2_1_11	MLGTVLPLIFSPFLRANLTLS		KALVGHQHSAMRELWDTSKLNMLRVW			?	N	N	N
c62002_g1_1_10	MLICLYAFLKSFTPIFMASTVVFVSLQVWIA		KFCCSRLKDCWFN			?	N	N	N
c62550_g1_4_2	MLIWKVLISMGFRVTVSGSLSALLSLSDLKRSDA		SCLGALCS			?	N	N	N
c38198_g1_1_3	MLLIHLYLAISLPLFITLLLYYSKYVLL		LCCYYWCINVTKILVC		I	?	N	N	N
c63506_g2_1_12	MLLLLLANFPGHDTLC		FPTIAPPPAVLYHPAFSVLAVMWNPVPEPPGSSVCQSRGKQVWLQELGVKMFGSHLLPKQCTPYTVQSLSLCQPPYPKTCPPEIAPAWLPWLC		XIV	?	N	N	N
c54415_g1_3_2	MLLLLVWLLYTCYA	IVNVLDTDVR	FPLFLFFTVCKLCVCCRWLAVTLCYCCCCWW			?	N	N	N
c5202_g1_2_5	MLMLFVLVFCCCFAAVCVG		QSGLKMWWQKERQRVDGGWWGRVHAEATLLS			?	N	N	N
c74547_g1_6_5	MLPFSNSCVALVAISFWASVGA	GMLVLETSTLLVLLLSK	TAVFVCCDCC		V	?	N	N	N
c99190_g1_1_2	MLRIFFSIQIVWLLATDFC		FPINSLSNTFFFLSYHYSLIFLRRLLIHLNLIH			?	N	N	N
c111670_g1_4_9	MLRKVLCLFLVFLLLDRCYVHS		AVISAMLHEEHVCCLDIFCLLKGSWFV			?	N	N	N
c61163_g5_6_4	MLRVKDFILLCPLTALMWPIVVG		LALSNIVPLKYPLFVLTLVCLCSPPLPLPIPLPFCF			?	N	N	N
c60313_g1_6_2	MLSPSFSILWILLPKVFG		SSRLKPEVRRAVSKRRSTRSFTDLSFLSASALFLSSSMMEFSGLISIVFLLDM			?	N	N	N
c8228_g1_4_1	MLSSASEAACIPSPFIWGPLPSLLAAPHLTLP		RKHCTAVRGNMALVYSTCSCARSCIGL		XIV	?	N	N	N
c63390_g2_5_30	MLVAAVGSLLCWTFYYCSVSC		CSKHGCLWNSENCGTVRPASVHILDVFPFASLLL			?	N	N	N
c64575_g1_5_3	MLVFAYCCYFCFLQTIS		FIPNIKIMQKISPPTPLQLLVTECPYHCT			?	N	N	N
c48545_g1_6_2	MLWLFLVLCAVFYLHDYVIT		VFLFSIHRRSTGHPPIALSYDMDLELSFSVVEMSRSVGAGRVRGRWLCGH			?	N	N	N
c63871_g1_2_43	MLWSLAKLISMATPCLVMMSLQILAWSLS		SPNLCSFTSLKRLSTIGTVKT			?	N	N	N
c1105_g2_5_2	MMEIPWFLFYDSSALPSLVSFFPVLGLSFEALSPASFFQISTALLLPHFPTVTG		IYPAEEVWPPSRTQ			?	N	N	N
c44425_g1_4_5	MMGYFCSALFWPTSLPIICLWLPQART		SLTPPILPSLLYPLLLSLIPSVQILTPIFAFR			?	N	N	N
c85191_g1_2_1	MMMPTMIATLWNRVICFLSATCSLPSTLGTFSLPMVLVVVMAIPWSWC		QHMMNGVHCQH			?	N	N	N
c64202_g1_1_2	MMSFLWFAAVVLSESIVHS		MMVMTFPWHTPVLKCVVLPNHHSDLLRLNFVLQHIFLYLVVVSAFVFFSLTPLLFCRVSFCQGIPDSSTDCCSHLLCELFLLSEIICYQF		VI/VII	?	N	N	N
c113706_g1_4_1	MMSRGAALLPYTSVIAVSSA		FDEDHCCRPQCSQEVGRLLKYHPN	GKRVR		?	N	N	Y
c57915_g1_5_6	MNCLQLLLVLLLISTIAA	LHGDGRVPQRRGRNIR	TMSNLLNFQTRDCPSSCPAVCPNQNECCDGDVCNYSNTLNKYFCIGCGSGGGE		XIII	?	N	N	N
c57739_g1_4_1	MNDLLAVSLSLGAFLCVLCPFPALCLA		PPHQTDASSFCDVPLISLVRVNADFDVFALRQFLFH			?	N	N	N
c41609_g1_6_1	MPAPPPSLSALPIASLSLALPACWPVCLS		VSVSVCLSVSFLLETHYQDLSLNENKV			?	N	N	N
c63440_g2_1_5	MPCIFLLMVIWFFSLSP		DFYNYMKVCPSWRVSPSLTRAVDCNDLYLKCLKSCISCGSRIRHFVLVFGVLHIHVHV		XIV	?	N	N	N
c64009_g1_6_15	MPDILMEAATWLYWLMSTMAPSSSVWMSLSHWMRASTLA		LSTPSIVRSSSSLSPLRLVVGGGKPMKGGMKNGMDGPKGGGAAAEALALAEAEVLLVVVVVVAEEAVAPPVPGAPACCGGCPMAWPGRPPGCIGGQPKGNPPNP		I	?	N	N	N
c49155_g1_3_1	MPGSVVLHIIPSALTTAC		FPMVWRSLCGLAFGTRLTKSGKCMGVGSCGPLFDDYS			?	N	N	N
c44169_g1_6_3	MPGTWPLMLWPTNAHNVRPPLPWLLLHDVQG		MVVLRKVKTKLSSKGRMEQSTPQGWQKICVREPSYRSATPTI			?	N	N	N
c61396_g1_2_9	MPILRCLLANMAFLCTFCVPLSLS		SISYPFLPLYKCDRSNRMVATHSTTYLPCGC			?	N	N	N
c32836_g1_6_1	MPLFMAVWVPLILGTFRKPGLHP		AIQPPGNVSLGILCSPPSLRARAP			?	N	N	N
c104455_g1_6_5	MPLVWIVRPASLWLQPSSP		CLRPSTLLLPPYPSALSSPYHL			?	N	N	N
c48883_g1_3_2	MPMGISFCPPLFISFCMPISPIGA		SPLGPLFGMPILPCISFPGIPPCIVFSCPSFPMCSCCFWCIILGALRMSISWGSSISSAIICSIASSSMSSAIVARTSV	R	XII	?	N	N	N
c60712_g1_2_6	MPNSNSALALLILFTALLWVYRQ		FVCVYKCIINVYFECVFCMYILKSCWCCTKYFCAIIVSAYKTTIPNFVCTLPEVLHTALLKNCEEVKSMHLSFSVLPIFVLFITKLE	K		?	N	N	N
c43320_g1_5_4	MPPCCFSCALCGIASMVPVIC		TVCGITSEPLIPAPVPQPCPGSSCHSLNDGIPQEAVSITKVTNHRDGAAAESFLRCMVSVLILHTQNITCVVPF		XIV	?	N	N	N
c58451_g1_6_4	MPPCVFGQVIAAHEPPLTRA		TLKPLLSCVCAQVTRTFVRPCKGTPTVLPITDERLLTCVSSDVGLEVGALKVGLLARFEVTHMHTSPLPI		XIV	?	N	N	N
c17074_g1_4_1	MPPLGTPAAPSVPIPTSIFFSSTTFSTRLICLSLTLSNNVWT		AVKNPDICCSVKPCSLAHHTALV			?	N	N	N
c69467_g1_6_1	MPPSLRMSFTLSAGAAKVIFPRIALHSVWNISLASSAATLS		KPVGTEASIV			?	N	N	N
c43106_g1_1_2	MPRVGEGLPDWAGLVISGLLGSLTRLHT		IEPSGPHPSVLLFSPPSPSFSTACSTVN			?	N	N	N
c29476_g1_2_4	MPSPRFTCAAITALLAATLLVS		SPFFSFFEGLKTTGSLSCTAEGTGFKLFVV			?	N	N	N
c63470_g1_5_14	MPTLLVYFLHFTAHTSP		APFPPPIPPPITHFLLSAASSSSRHALFLFFPTQISLCCL			?	N	N	N
c82047_g1_1_6	MQKATVLILAILLLLPLSTA	QDDEGSQENAAER	ELAGTTDCGGTGESCGGSDDPDCCGLQKCVSGKCCPTTDAC	GR	XVII	?	N	N	Y
c60457_g1_2_5	MQLLFLYMPNTAALAFIVLALARPKVLA	LALR	SACCCCCSCDL	G		?	N	N	Y
c64323_g1_5_3	MQLLLHVAHPPVVAFLCPFSSLFLWLPVQT		HLFFFLPAPFPTPFFQHSNTHSHPILIPHLFPA			?	N	N	N
c77816_g1_6_1	MQVLQVIMVGFFFSSVAVHS		TYCIPRILLSVFISC	RKSHIFVI		?	N	N	N
c53730_g1_3_6	MRCYVLLTVTLLLMWFSGGDA	GPRHAIGHFVRR	DCQTGCVGCNNRAGCCCGGQVCVDNNRCEAGS			?	N	Y	N
c60465_g2_4_16	MRFLFPLISYPLVLKVSLS	LSHSLR	TDCNGQVAPDLSAEPVQIENTHIQRYVRRYVSKQQSVVTRNIKSSFFQLHTHDCTVSGPWTFTLGILHTERNVQACTTSSRHCLRTVLSLHVNNFSVLRFFLQVGSQLSNTDPPHSYN		XIV	?	N	N	N
c62833_g1_3_1	MRFLPVLIILLLLTASAPG	VDVLPKTEDDVPLSSVYGNGKSILRGILR	NGVCCGYKLCHPC		I	?	N	N	N	MrIA	100
c57769_g2_6_6	MRKPGHIILLGVGILISLPRETES		EFRTALLCIPSSPFPCLPLPVCLLGAFGLKQTVCFPFCLF	RR	XIV	?	N	N	N
c62201_g2_2_9	MRLPARLYFGSPVIVDFLTA		FEFGLLITCCRFMCMCKRHVTRGTLCTVLKEESDHHTFCLTHSDVL	RTIYFFFIPEFTLFSLQ	IV	?	N	N	N
c60879_g1_1_2	MRPGPAEEGTQLLLLLQLLLSGEDVVAVA		FCCSSCSCFFSSALASLESACTSLVILISSPAKSNTLVMVIFPLLLPLD		I	?	N	N	N
c62011_g2_5_5	MRRSASFRAILPGGVLTIPLSAA		IPRSMRNASTRLAPSTNRSVRSATLA			?	N	N	N
c9074_g1_4_1	MRSAEIPIPLVCPPPATG	RPDGSTESRGSR	CPGEGCPQGTRTETAHMV			?	N	Y	N
c54831_g1_5_2	MRTIRALASFLHPLLP		LSPPPPCNKNNNKQTNSGQLKRIFFQIIIYPWHTCCINYTQAFREGRDELLFVLLHMVVSVEIEVLGVLDDDDGTGAVVDEIVADGSHESSTDSPQPP			?	N	N	N
c62727_g1_5_2	MSAAVLGLTVAVTVSA		ASLCILRSLPEYRRDRWSSNRALRASTSCCSSTVSSPAVAATASEALFFPAISSLSIRA	RKS		?	N	N	N
c42420_g1_2_3	MSALVSFFPLSLSLPFFLVAIPFLLLRSTLELTGA		DWITLFCCGAERLLGGLLGGCPCCPCMVPCRFFSLRRVALSCSFPSTAFLNLRASSSLAKFRPAAHVWPSKVWKYSLGVL			?	N	N	N
c44614_g1_2_4	MSIVVIFIIAIDLPLLPS	LPPPPPPPPLLPGGTPRPAARIR	SPCCWCCGCGRGRRGRGNGRGRTWSGFWLCHSTSRSAARSP			?	N	N	N
c3420_g1_2_2	MSNPVVLILIHLASLSFVCFCGG		FLFVFWGVPPFSSNNSTTFSCCLLNLILFCIIL			?	N	N	N
c89064_g1_6_1	MSPRGNPLFFPPPPSAVLLSVTSFWFLPAQS		HPLPSCHSPCGGSPKETISIRFS			?	N	N	N
c34499_g1_1_3	MSSVPKIPMSLLFFLFTLLIIPSSLP		IIKLFFPCVVFFSCSF			?	N	N	N
c90658_g1_1_4	MSTLGMVLLVLLLLLPLGNS	DGDGDRQAMHRDHTAARARSASRLRLKSYMDHGRSADKR	CSTIVCGSKCCSSSDCTCGIVGSQSNEPSCSCPV	GRK	XV	?	N	Y	Y
c53618_g1_1_5	MSTLGVLLTICLLLFPLTA	LPLDGDQPADQSAERPAERTQDDIQQHPLYDPKR	RCCRYPCPDSCHGSCCY	K	III	?	N	N	N
c60769_g1_2_4	MSVEYQLLGFSLIPLIFSEVSVC		LHIIHTNSKTGLLFRKVGDGISPRCLRSNT			?	N	N	N
c36401_g1_1_1	MSVFHCCWLVFVLSACVPLLLA		EFVQQVLIGWSLIPLPCHWLSSHTVQLNLWFNKTHCIITM			?	N	N	N
c53438_g1_2_1	MSVGFCFCWMLFLWCVVVCCCC		FNFSLLSQLTWRWEIMIFFFFFIIIHVELKDWLVLFRFPNNVSVTDIASE			?	N	N	N
c86076_g1_1_1	MSVVVVVVGTSVVVVVVSA		SLVVVAVVGSPWGTVGCASSCCCC			?	N	N	N
c80235_g1_3_1	MTAVYTLILVPFFRCLLFQTLLYSLPKALLALASLLSSSLSILA		SDIKSYC			?	N	N	N
c115922_g1_4_1	MTKFTPPLPPSFSFITPLPPFPALFSVSMHSHIQPSSVSA		SILRVHRQQSVSGHHEAFIKER			?	N	N	N
c62930_g1_2_6	MTTAACMVVSGFLSAAGTILA		NTGTRLLNLQLAKTLARIRNQTIMLTPL			?	N	N	N
c41440_g1_1_1	MTTFSMRSRLPGPGALLGFLSSEPPSSHC		HVLVPAAPCLARPLLLFGITV			?	N	N	N
c62687_g1_2_10	MVAAVFCAVVVVVDA		DDGGSLLCCCCCCKVIKMECNDFLILCGFSYSHYSAFLFLD			?	N	N	N
c59925_g2_2_1	MVALKVTEAVQYGLIALGAFLLLCFIIVMVRA		VTTSRDREMKPMGETTPILPSA			?	N	N	N
c49314_g1_3_3	MVALVPILTSLFLQFSQFEWDPNFWSVFLCEC		IFDVSRIVSPGVINAIMVSLVIDMLRTLTQI			?	N	N	N
c40316_g1_1_1	MVDALAFLFFFFFFTTAC		DPCTTDDDVKAFKLFLFLQPVIPVQQIPCCDSRPGWTAHCTLHTQIYISPVFHSPLGPFSCLSSGVTVSEKLVSCD	KRSGSRT	XXVII	?	N	N	N
c80563_g1_4_1	MVFTGLFGDAGIIFSCHLFLSFLFIFLSLPGMPDGTA		DHCLTGYHFQKCS			?	N	N	N
c50923_g1_2_3	MVGRTSVSFLLFSIMILGMVATVIC		SCEERISSEQCEAPGERICSCSNHVCCQLSAAKKDQCMTPFMCRTASGGN	RRRRSTQVQDRFLRMARGLAD	XII	?	N	N	N
c61647_g1_1_2	MVHFAPFLTAALVTLAPVGS		FLSTLLITPTATVCLMSLTAKRPSGGYSEKVSTTMGLVGVIFTIPASPFFKNLGSFSISLPERLSILVKISENLTAM			?	N	N	N
c51822_g1_4_4	MVIPFILPILTSFFLLSHLLYHLIG		ISPPSLTPNTKLRSL			?	N	N	N
c63497_g1_2_28	MVMVVSALSLDPNLT	APLPFLTSTTHRPSFPPAPFTLKAYTPFIFFTMLLPSSSSRLAISLKRVADLKSLSEGPELVR	DAWICRPMVSGKPCW			?	N	N	N
c59678_g1_1_3	MVPILRKPTCCLSFLIILLPLVG		IYFPIASPSIPCSGFPSSTKNVDSFSIIHTF			?	N	N	N
c62170_g2_5_2	MVQDFLYYPHPVLHPPPFPACCVFFVFFCSPSSLP		LQYGFVMGVTFRDFYQESSVQLLSQSTNDFKMSCGSSFVCLCLNSVLFFFF			?	N	N	N
c59273_g1_4_15	MVSVLLVHGSLGWSVHFIFPYSHFKSMEGIKPSSSLLHMMCIFRINRLLAWLLCFVFFSSHG		TECTNFVLCEGAACLMTVTSLSFHVRII			?	N	N	N
c18285_g1_1_1	MVTALKWPFEVGWAIGSFTLPYFTWSLA		GSDSHCGLHNAGGSESCLSFGHLLCTLSTDDFTLSHHQALYFSLPCPHPSPPLPCLPPPVPLQ		XIV	?	N	N	N
c103395_g1_6_2	MVVCVIVFFPDTLLLACLFCGESFS		DAFCSFSRTENRYIRQVMLRKYHYFLFYDGAVCLMLKTNFSSCGALSVFEIIPLL			?	N	N	N
c114754_g1_6_1	MVVLPIISFPAERNVLFPTCTCQTVTLLTGTLA	SPGRQRLSTLKR	SCIHSSQEPTAKCVLESTCTQLIYPF			?	N	Y	N
c39461_g1_5_3	MWLVLFWMFDLMGHSFS		ICVSLFEVCCMQIICVSHQIPTFAFDLWTVS		XXIV	?	N	N	N
c40500_g1_1_2	MWVLLLLFLPNFA		KDNSLVAVGSFTCAHKAGCTRDLGLSSHPKDQRPDHTQTVY			?	N	N	N
c67547_g1_6_5	MYIHIHFSLVLSFSIPPPSLS		LFLQSSPFLFCSRICAVYCVEMFERFQI			?	N	N	N
c59237_g2_6_5	MYLLCPFSFLCDLFRLPFFSSA		SYMICYFHPVSVNGYACSGSVSLGVM			?	N	N	N
c64142_g1_2_1	MYMPEMNFSYLCLPALIECLSTCLS		KSVVMKSKQPSSPNAPHSVLISISGGPGSLPSAISTLSSFSM			?	N	N	N
c14577_g1_5_2	MYMSMYLLLELFLFFLSAQGVCC		TEHLCDVCLMSARLYYPRPLFPLSVRCTC		XIV	?	N	N	N

## Sheet: Table S2-3
Supplemental Table S2-3: Putative conopeptide precursors predicted with ConoSoter (Que-3).PAM:postranslational modifications; PTM pyroglu:First amino acid of mature peptide is a pyroglutamic acid; PTM gla:γ-carboxylic acids; PTM amidation:C-terminal residue amidation.PID:Alignment similarity with known sequences.
Name	Signal sequence	Pre sequence	Mature sequence	Post sequence	Cysteine Framework	Gene Superfamily	PTM pyroglu	PTM gla	PTM amidation	Closest	PID
Lt5b precursor. c39580_g1_2_4	MLCLPVFIILLLLASPAAP	KSLETRIQNDLIR	AGLTDADLKTEKGFLSGLLNVAGSVCCKVDTSCCSN		V	T	N	N	N	Lt5b	100
Qc5.2 precursor; Sequence 45 from patent US 6630573. c28119_g1_3_2	MRCVPVFIILLLLSPSAPSVDA	HPMTKDDVPQASLHDDAKRTLQVPWMKR	GCCAMLTCCV	GR	V	T	N	N	Y	Qc5.2	100
Eu6.6 precursor. c1593_g1_2_1	MSGLGIMVLTLLLLVFMATSHQ	HRGGKQLMLRNNLQKR	TCSSPSNCPTGQECCPDKVDEPEGFCADECIIT		VI/VII	O3	N	Y	N	Eu6.6	100
c5387_g1_3_4	MSGLGTMVLTLLLLVFMVTS	HQDGGEKQATQRNAINVGRRKSITRR	TVDEECNEYCEDRNKNCCGKTNGEPKCARICL	G	VI/VII	O3	N	Y	Y
LtXVA precursor. c32826_g1_1_3	MEKLTILILVATVLLAIQVLVQS	DGENPVKGRVKHYAAKRFSALFRGPR	ECTTKHRRCEKDEECCPNLECKCLTSPDCQSGYKCKP		XV	O2	N	Y	N	LtXVA	100
contryphan-Lt precursor. c29360_g1_6_3	MGKLTILLLVAAALLSTQVMVQG	GGDQPAARNAVPRDDNPDGMSGQFMNVLRRS	GCPWEPWC	G		O2	N	Y	Y	contryphan-G	100
c34625_g1_1_2	MKLTCMMIVAVLFLTAWTFVTA	DNSKYALENRGGWGKAGGWGQAGGWGKLFPMARDEMKNSDVSKLDNR	GRCGKDGDACVFPVVGSVFCCSGVCVFVCIGF		VI/VII	O1	N	N	N
LtVIA precursor. c30089_g1_5_1	MKLTCVLIIAVLFLMDNQLITA	DYPRDEQVYRAVRLR	DAMQKSKGSGSCAYISEPCDILPCCPGLKCNEDFVPICL		VI/VII	O1	N	Y	N	LtVIA	100
c30089_g2_5_1	MKLTCVLIIAVLFLTASQLVTA	DYTRDKWQYPAASLRDGMWNLRDTR	ACSQIGEACLPQKPCCPGCLCNHIGGMCHH		VI/VII	O1	N	Y	N
Lt6d precursor. c22540_g1_1_4	MKLTCVPIVAMLFLMACQLITA	DYSREKHGYSAEKSSDKIQDSFYSKLTKR	CTDEGGDCDPGNHNCCRGSCLVLQHKAVCGILYTMVS	R	VI/VII	O1	N	Y	N	Lt6d/Lt6e	100
LtVIC precursor. c32277_g2_5_1	MKLTSVVIVAVLFLAACQLTTS	DGSRGTWKDRAVRSITKVSMLR	WPCKVAGSPCGLVSECCGTCNVLRNRCV		VI/VII	O1	N	Y	N	LtVIC	100
Lp3.1 precursor. c77615_g1_6_1	MLKMGVLLFIFLVLFPLTTL	ELDTDRPVERHAAIKQDLKPQERRGIRLHAPR	DECCEPQWCDGACDCCS		III	M	N	Y	N	LtIIIA	100
Ec3-YDG04 precursor; Qc3.1 precursor. c37286_g1_6_4	MLKMGVVLFTFLVLFPLATL	QLDADQPAARYAENKQDLNPNERKEMMLSALRQR	ACCDPDWCDAGCYDGCC		III	M	N	N	N	Qc3.1	100
c37676_g1_3_6	MMSKLGVLLTICLLLFPLTA	LPLDGDQPADQSAERPAERTQDDIQQHPLYDPKR	GCCVYPCLGSCRGICCYN		III	M	N	N	N
LtXVIA precursor. c86771_g1_5_4	MPKLGVSLFIFLVLFPLATL	QLDGDQSAGRHAQERGEDLFKMYQYLRRALERR	RTGEDFLEECMGGCAFDFCC	KRSLRDTTSD	XVI	M	N	N	N	LtXVIA	100
Lt0.4 precursor. c27985_g1_6_2	MSKLGVVLFIFLVLFPMATL		QLDGDQPADRRADEKDLTQQYLNLRRVLQRGLVCAHASPYHNAVWS			M	N	N	N
Lt11.2 precursor. c22646_g1_6_3	MMFRLTSVSCFLLFIVFLNLVVLTNA		CIPEGTYCQFNADCCLSQCCWGSCGNPCRFP	GKREKLQEFFRQR	XI	I2	N	Y	Y	Lt11.2	100
c39976_g1_1_4	MQRGAVLLGVVAFLALWPQAAA	RVYDLNEPDVWGMVDYAQR	AMHSCAIVNDYDDRRWSSYNVAEFKDRSLFRTMVTDLQGCLNYFFQIRP			F	N	N	N
c40567_g1_6_1	MGMRMIFTVFLLVALATTVAS	FTLDRASKGRNAAADDKPSDWIALAIK	QCCANPPCKHVNC	R	I	A	Y	N	N	Qc1.2	100
c39769_g2_3_2	MGMRMMFTMFLLVVLATTVVS	FTSDHASDGRNTAANDKASDLMALR	DGCCSNPSCSVNNPDICGG	GR	I	A	N	N	Y	Qc1.18	94.7
c24767_g1_3_3	MAADILSLSLICLLISSA		VWWVPSLIKISTLNFSGNVFSIFLRRLRPMMEAREQWGTVGTNSMVTSVWPAGRRVTLTPSSLTTFSSSSVSGFSGS			?	N	N	N
c26972_g2_6_2	MAAFRRVISWGLLSAGILQPDFRALG		RSLMVFMSVIESKESC			?	N	N	N
c88604_g1_3_3	MAASYCFTILPILRALLLSPACL	APYSELLYFSKR	WVKASITVLGASGAWNNFLDSSSVGSGGSSDVSSCDGCPLSPVPWTADL			?	N	N	N
c35675_g1_6_17	MACTLFCLDTLLIFFTILALFCMPFSRP		AKLESISNRSCVKYPPCHHLLLEQRSITEACVGV			?	N	N	N
c17250_g1_1_4	MAETYIFVSVTALYVFHNVFVSC	TEERR	IYHTNLDFISVKEHLFDCTCSVFIPVKALQVSYKHSVFMSKSCLAFELQIQCDCPEQLALCCNFCEGTIQL	RKPLFSLL		?	N	N	N
c36583_g2_3_13	MAFLLLCTYWALWYDLYVSIFS		KQSYSTYSTGRIMFFLSSPHTLLPQTYPPPCKSVEIDLPSNERTRVQI			?	N	N	N
c36075_g1_1_18	MAGGPAFFRLGYLAFSFSSSICSAVFSGTCFSLLSLSCSFSGSLSSTSVG		DVPSSDAIFVDHQPSY			?	N	N	N
c26905_g1_2_2	MAIPIAIPIATKTCAA		INVHVPFAIPLRSTKCCLLPYEHGSAHENKLGRDLVASPFDFLVRSGA			?	N	N	N
c39343_g1_3_8	MAMLGAIMLGLVMPIVCEVIDA		AELTPIGLPIPACCACCIMGMCPGCTDPWEAMMDCPWGTIMMP		XXVII	?	N	N	N
c57791_g1_4_1	MAMNVWMTISVLVVVVMATAVTG	STPSQEQERSSVDRTKK	SCCAMKTYECLRDRDCLISQDSDCATPCKNIDTSGCDSADGNDCCASYMDCVVDCQIDTGSDVEDPLAVCYNSCNSAHSC			?	N	Y	N
c43543_g1_4_1	MASFALLSCCMFIAPKVIL		VSIPFGTCRCLHARAFKAQGEPKASQKHIYMLTPFPFPNPRIPPPSLFISPSPPITHPPFSLLYNSCLLVTDIIVLLFSGMEHSSDFCA		XIV	?	N	N	N
c58086_g1_3_1	MASRMFLFMSSIFIFLSSAPNPLTC		NIFICFTIVDFPDSPAPNSRRRCVALYNCLSFCSCFSMRLFASFRILSSSSSLF	RKHPMLSRMVAIFASLEG	XIV	?	N	N	N
c7299_g1_2_5	MAVIVVISFLYPSPPPPTSHS		HRHFPPCHQPIACVRHDFMHVSEICIRMNILLFY			?	N	N	N
c85538_g1_2_2	MAVSISIQIAVSIFACVDG		VSKSVYVDDCFYISLRREMSVYPFMSTVFLFTWVAVSNSVHVDNCFPS			?	N	N	N
c31447_g1_5_8	MCMPYICVQIILLVAEVSFC		EGLAHLKLNKYMLDSLAQLVCFLSCLVSLFCPVDYFVLGRWFCYVLDCPAKHSAVIETLVASKLSIHQ		XIV	?	N	N	N
c87376_g1_2_1	MCNQGMCVCALGGGILSALVCA		CRFEMVVKFIRVLFPSTAYL			?	N	N	N
c239_g1_4_1	MCRPAIFPVPGFVMNFVYG		HERGKVILEGQKVIPRRTLESGYKFLFPDLTSACKNLSSGS			?	N	N	N
c38553_g1_1_1	MCTLDPAMAVAGGVVVVVVEVET		DVPSPSSTLDCCLCCRCSCCSCRCLTSCWHLVAILSRRQLNRC		XX	?	N	N	N
c32622_g1_5_1	MCVMLGCCCFFFHVFFVDIVFQ		LYYSFNAIQLSVGCKATAVLQSDMNSFQVLNRCCKANCRNTEQHLSVTETEQHVLHGSLTSNADICEELSIPVSPLKYDCQAALVFCCSLREISHPTAASNHTLKHRHAGRC			?	N	N	N
c28535_g1_2_9	MDATFAWMPPAIRGPPTATVWCDESGRWLCCMVLCAVQVVWKGVLS		MLREESCVGG			?	N	N	N
c33037_g1_5_1	MDCFPSATAIVAIVFAYVHA		YRSRGEFFVIPGGQSKNGSGERQKLVN			?	N	N	N
c39964_g1_1_23	MEIFFSRLVMFFSIPVFPSNATA		MYSFCITTSSPFMGVTSFCCFLAFLSLLRDTRKVVNPRGTKLAGKTSSNLEVSPFLSGIRNVSGDSGITSEATCCPSGPLTVKPTSCSDDT	GRRT		?	N	N	Y
c29273_g1_6_3	MEKLAILLLAAAILMLTQA	LIQDGEKHQRMKTHFLSKR	KSVVESWWEGECSGWSVYCVNDWECCSGECGGSYCELW		VI/VII	?	N	Y	N
c38566_g1_6_2	MEKLTILLLVAALLMSTQA	LIQDGGEKRQKEKIKFLSKR	KSVAESWWEGECSGWSNGCYWDSECCSGECTQGYCDLW		VI/VII	?	N	Y	N
c54605_g1_1_1	MFAAGMTAMALVVVVVVLAAVVTTRRCVA		DSCCGCCGLRFMLNKLCCRLECDKVAAITGTAPRTGL			?	N	N	N
c74620_g1_6_1	MFCFFQQLFSFPHFLFVLLSYPSLTA		LGCCWILFLNPWWSRYHRIVDCGASLFEAWATLIHSGVPS			?	N	N	N
c56348_g1_2_1	MFIHALYLSDLISLSILQVISG		FEDHFIEIIHDTIIAFHV			?	N	N	N
c40158_g1_2_9	MFLLNVLLPLDFGLPCCVWL	QETRFFIR	YGCCYGTVMKMIIISCILTILFFF			?	N	N	N
c3112_g1_6_1	MFLLPLSNILLFPAVT		NIFHLCHHYIFLFSRLSQNILVFTAVVECSYCHCCYKIFWCSHAVTKYLCLYCCYKIFLASLLLQNICISTAVTKYSLLSIV	RKENLD		?	N	N	N
c5400_g1_2_10	MFLVLAATPFPRWVRS		IFWTAVFRTTYPFWTATPSPSAHGPGSIASVPRTQRASPSP			?	N	N	N
c30844_g1_3_10	MFNLYFGFFSATSAVHFTLLVTVLLTIASITHT		QMMCFGQHISIFYLMG			?	N	N	N
c36915_g1_3_17	MFRAILLSFVLVQHC		LDVLVEFCPLSILLYNQFGGLGGMGSRMT			?	N	N	N
c37964_g1_6_1	MFTPLPMKLCTLIWMPVFCMMLNLSQS	ETFIYQR	KEKGNKIILPSNILLKIIHFEKFDSQSFNACRKKNKQTNKNRQQNVATHFLGRGPEFHREVCCDTNVIYMETLNLSSLTGYIFFMICH	K	XXIV	?	N	N	N
c39119_g1_2_11	MFWAALIFLSFKKPGLALTAWPISLAAWASPSACTTFCCFSCLAFSTRNWARWASCWA		TCLDSTAAVYSRPKLSSVMETSSKMMLKSLARSVSSRRINSDTCWRCVIN			?	N	N	N
c11231_g1_6_1	MFWFLRAASVRLTPPTATLLLAWPKTFT		AQLRPDPRILNI			?	N	N	N
c66494_g1_3_3	MGALASAPPVPQILFPFFTITTS		LPICDVSNLTTGISLSCT			?	N	N	N
c69918_g1_3_1	MGCFPSRLLAFFNKSLIAIFFPLVCLA		DIVFVRHSEFHQVHLFLFLSPYHQIWLLRCWDGEETLAAL			?	N	N	N
c43555_g1_2_1	MGHWHLCVVWSSGFLSAAIL		EDTRYSGAVIFSSAAVCKRL			?	N	N	N
c42346_g1_6_2	MGPEFSALKLSMRFVCFVAFHQLVSA		RSAHILSITRYTYCSLSSLHHQYLYMCQTMKGGIAGATHLYSV			?	N	N	N
c37189_g1_4_12	MGPMTAVIIIVIIIFSSESACG		SQNSRAVFLFFFLFLTQGGLRWRGSSQR			?	N	N	N
c40378_g1_6_2	MGRFGLLGSVVFPLYKAISLSYLCLSLAAISS		KGFFLVSCISLHFAEHSLVNSAIFEIDLPALLASSRQ			?	N	N	N
c12892_g1_5_16	MGTLSVPLPIWLKPLGC	DPRGSAHR	CCCRPSCQSLGCWWPQNRRIHATTAAHVRPRVAPVPFSPSCRVLLVSSKTIAERDSQSGDMD		II	?	N	N	N
c30662_g1_3_2	MGTMKAALFLLLVLALGTIGVSG	EDGQTMQGKNPSDTYIRAVRRSAGKHR	SNVCAGLESCSNSCCHVGRRCQCLKIRCEQ		VI/VII	?	N	Y	N
c28368_g1_1_15	MGTTFLEESPMVLIGMMFLEGCRT		TTTCTATVLRSPWSCRAASTLSLPSSPRNGRTTKRLCCPTWRRCTLGSMVLSRIRQRARE		XVI	?	N	N	N
c21989_g1_3_19	MGVHPSLRAALTVLGKSAG		LEPKGLMLNVTLRPLQSGPPKNIAEVKGIRQTATTDTFPSIVQ			?	N	N	N
c23086_g1_6_8	MGVLCCQVFACLCVCAFAPMMFGMHVHLSMCCMSVQVPVDA		CSYFNCFVTVVQERN			?	N	N	N
c31205_g1_4_12	MHGQVFFPLILVPSLSCTFPRNHHFLLLIIFIPLASA		GHQHRFTGLMATSG			?	N	N	N
c39525_g1_3_23	MHQIPLILIVFLYFAHC		FDNIHHFLQKSQQIELRKKAVSMISLSAEY			?	N	N	N
c76039_g1_6_4	MHVCLLISFPSLVYVLS		LFHPMVRMNGNKTGSTVNENGLRQAECISSPKALALFKK			?	N	N	N
c45767_g1_5_2	MIEFYQNLPLGSLGALATATQFASWVPACVS		KQCTLSHILHSNSRTLSSVATLAQQQLIQSTRAIGHPRIATDLGGDGRRDLFIDQSFPFTGG			?	N	N	N
c43690_g1_5_1	MILTALCLYPFFSIHIMHNPSVCLLPAIAVA	VQVMRRRLLIFFPSDSLLR	DIDTLYAYLSFSPFFLFCCLIFRATSVASHPP	R		?	N	N	N
c89632_g1_6_3	MINLFALRLLASSAVIFG		VECPFSIHVWCHEFSNVVSWTSRSAFWATLSSCEESLESPPIATTRPFWGSPSTSPGLT			?	N	N	N
c34393_g1_3_1	MIVALQLVLSTPGALLMCLLSG		HVWRPGKGGGLTISFPILSKPASVATVPGRTLFISFSAQMYGLWIP			?	N	N	N
c19479_g1_3_10	MIYAAWVETDFIGLTPFFPALPSPPASLA		LTFTASSLLPLPCPKTTNKQTDTKTKYNWLKKQKHAQEM			?	N	N	N
c85953_g1_1_2	MIYCISGLTVLGLFWALPSFFSPVLS		NVLHFPLCFLPITNKKWFLCQLHAGHSFLTHLCLLKSEEAP			?	N	N	N
c91616_g1_3_7	MKCFSHWFVALLFLFLLQLFVLNA	AVHSKK	FCELARDFHCRMEQVQIGNPGEMTKSASFCWCRVDVAPLVLSFPILSPCLSLSLGCPALDSFTCIFCSVLFIVKISFRRTWEEC	K	XXII	?	N	N	N
c56081_g1_6_1	MKCKIIVLKVELFFFCIPFPFFSATSL		NPYHLGFISRKENKFRQ			?	N	N	N
c62422_g1_4_2	MKHLPMHIIIYIFLLPPIHLPAHITHT		APYHQSSTHLASHISHVSHTGR			?	N	N	N
c24829_g1_2_2	MKIPCPGALPSLPSLTMSAA	RSGHR	HPEGGLPLDLGCPVSGLYRLSLTGVEVYSFCCCNAWIWPLNLFENCSEWRRQPQCLAVQNCQ		II	?	N	N	N
c40354_g1_5_4	MKISLIICLLLIAFMNG	DGSPGNTMYSRRSAGVAAAIKRFQKNFLKK	SCNNCPEEPCCAGDQCMPDPGYEPFCGN		VI/VII	?	N	Y	N
c57242_g1_5_2	MKLLIVDYILHYLLCTLLISIIFTSTA		KHESDDWGLKTKLYLSVLIRHY			?	N	N	N
c49057_g1_1_1	MKLTGVLIISVLLLTASQLITA	DYSRDKRQYLAMRLRDGMRNFRGVR	DCGEQGEGCRTRPCCSGLSCIGTHAGGLCQPE		VI/VII	?	N	Y	N
c66372_g1_3_2	MKMATLILMFIFYAIVDETCC		FIVTLAIFSYTCSGFGDGPFSSLVFSSLLNQIYLAVKLFTCICRAFAIF	R		?	N	N	N
c26201_g1_4_9	MKSLPPPLLAHILSIFPPSLC	TFKHEIFR	SFLAALIVCIADVCNSVY			?	N	N	N
c15904_g1_6_1	MKTALLFLGLVAVAVASA	SSNRQAPRSHGDPLHNLVR	QEVKFLKQHDPTLDVTGCTDQCDAIFDLGSPHNEHLLDNLCYSEC	KKAFHGHHGHPTSTPAPSTT	XIV	?	Y	Y	N
c29464_g1_3_3	MLAAWFSVIPVAMSIGSLKMALGFFSATSSMS		TPPSGLPTMTGPPKPRSIKMAK			?	N	N	N
c40144_g1_1_3	MLAYWRPSFSRFISPFFALSLLYSISLPCNLWA		IDTFSCLRVILY			?	N	N	N
c38009_g1_5_7	MLCGFVDLGVCVLDAPWPCLS		TCCPPFQADGQCCVLMIWCFLAYIVWLSKPVVLPVAIVEVCPVYCFMWILYLTAHGHPTILFCSSPLIPCPQFFFSCWLFCF			?	N	N	N
c81873_g1_6_2	MLFFLEIMKMLKKILFCILSVEFSALGGRS		QNNLFLNCASLSTQLSHVQQFVISFPRLTVLLQDIGVLC			?	Y	N	N
c17369_g1_1_7	MLFFVFLMFHVLCSLSST		LPSSPKYITSLSLTLHELPCPNLGSHSSSTAVKVAIIHWSYRGNLPKETLLYC			?	N	N	N
c38147_g1_5_2	MLFVEVGILLTQGRQLFLRGVQA		AECSQNVLNTLVFLLLGLHGRCFAVWLRLGFRRLSSYHGSLSCARPPCFLGRTCCSFLCRFWRLA		XXIII	?	N	N	N
c37378_g1_1_7	MLGLPFTSFLATLVTSA	EVMPSTRLMRSAVLR	ICSLPRACSARSLSTASAPSLYMQIWAFSCFLAVSTSFSAKPVLVTAANWLKAARRTFSTSLACAIA		XIV	?	N	N	N
c26493_g1_3_14	MLGPGALAGSPAVGQAAATLPPLADCVCAAALAVGPLPATA		FSLAMVVFGDLQKHPAWTETIWHPCCPALLMLFCCGVKSQSLWECIVAPLTPNVCCSHTPPDWHHLLTVSWQSPHSVHYRHYLPPLSLLC			?	N	N	N
c37496_g1_1_18	MLGSCQNIGMITFVLRGIWG	LINKR	KITMQLIDAFCVASPLLKKMLRYQCCASPCCV		V	?	N	N	N
c40168_g3_1_5	MLGSRHNATWWWPFLTAALPGLVACHSLLC		FQQQRLPPTPFCVLPFSSPLLHFGSSLHVSPSQVLDLFAPHLQLSLTVLLSLALLLLKIHQLPLPLQFQPLSGLPHPLLPLTILFDAIRIFMLGADSYRPS			?	N	N	N
c36230_g2_2_21	MLGTVLPLIFSPFLRANLTLS		KALVGHQHSAMRELWDTSKLNMLRVW			?	N	N	N
c53035_g1_6_1	MLHSLPAVLFLEICSIGCIPPPSSLS		QHMPRMRQSPPVTWHNSSSRQGFHYKVHLQHQQFDTNIDKNL			?	N	N	N
c20418_g1_5_10	MLICLYAFLKSFTPIFMASTVVFVSLQVWIA		KFCCSRLKDCWFN			?	N	N	N
c53080_g1_3_2	MLIPILRSLFVRVLLLHIIS	FDRER	VSFTWLKCLKSFVCVVQCEVT			?	N	N	N
c39964_g1_1_3	MLIWKVLISMGFRVTVSGSLSALLSLSDLKRSDA		SCLGVLCSW	G		?	N	N	Y
c12121_g1_2_4	MLLFWFLIMFLKTGG	EHLRGIPMILGVALPLSASRR	PVSVLMNLLYTISKQFCCVYCSFLQDFSLEVTVVKRPCAVPRNNDKN		I	?	N	N	N
c24482_g1_4_1	MLLLLLANFPGHDTLC		FPTIAPPPAVLYHPAFSVLAVMWNPVPEPPGSSVCQSRGKQVWLQELGVKMFGSHLLPKQCTPYTVQSLSLCQPPYPKTCPPEIAPAWLPWLC		XIV	?	N	N	N
c19192_g1_5_1	MLLLLVWLLYTCYA	IVNVLDTDVR	FPLFLFFTVCKLCVCCRWLAVTLCYCCCCWW			?	N	N	N
c35998_g2_3_2	MLLWVITRVRRRPRAWLALLILAEISLS		REPSLEMTLPRYLKCSTVFRVVSPMVMVGGGCTVGPGEGW			?	N	N	N
c22676_g2_6_4	MLMLFVLVFCCCFAAVCVG		QSGLKMWWQKERQRVDGGWWGRVHAEATLLS			?	N	N	N
c24226_g1_6_7	MLPFSNSCVALVAISFWASVGA	GMLVLETSTLLVLLLSK	TAVFVCCDCC		V	?	N	N	N
c91791_g1_3_1	MLPGFPGTWWCSVLVPVLIHWTQG		HPSSLPGTDGSQRLLMETV			?	N	N	N
c81769_g1_2_2	MLPLFELAGILSILDHFFLVVNS		CKFASLLSLQTISSTDRQTDR			?	N	N	N
c31454_g1_6_2	MLPNPVSTTLLICLGGGAAVAPSSLA		FPPSPSALAAGGGAVPVLSPAAGVASFSGILSGEGEIWNSGRQGGQTRQGLVKEAFSSVCPADKGEN			?	N	N	N
c80862_g1_1_1	MLSLCPSPTSLFIVFFPLLFLPLPLFLPSALFLSPPLLVSFNRASS		LHYGYERFFVIVFV			?	N	N	N
c58162_g1_2_1	MLSMVTVKVVFTLFPLSLS		LTPSPRILLLVIFRTLNTRNWEMEVGRDDG			?	N	N	N
c30898_g1_3_17	MLSVSVVGEALVTSPLLPAGPLSSA		GVKESSDVRSSSKPQAL			?	N	N	N
c39353_g1_2_67	MLVAAVGSLLCWTFYYCSVSC		CSKHGCLWNSENCGTVRPASVHILDVFPFASLLL			?	N	N	N
c39057_g1_5_12	MLVWYILPTISFHGWLCYFTRLLFTSFTHA		HKISISPSILHT			?	N	N	N
c39982_g2_2_56	MLWSLAKLISMATPCLVMMSLQILAWSLS		SPNLCSFTSLKRLSTIGTVKT			?	N	N	N
c20415_g1_4_7	MLYVGVFCSILFGLQAMLC		HNLYSFWMPYTSAIIHLVCVGACYLSCPVCLNECPSVVSMCAIIPSSESVCT		IX	?	N	N	N
c49021_g1_4_3	MMFPLVSVSCFLLVIVFLDLAST		VPELRYDLVFGNIPKVVLTNACYPEGDYCEYHDQCCKGSCCFAYCRDPCRRV	GKKAQLQEFLRHR	XI	?	N	Y	Y
c24534_g1_5_1	MMIVAVLFLTALA	DDSRNGFENRNGERNENEMKNLEASKLNRR	DGGCVDGGEFCGFPKIGGPCCSGWCFFVCL		VI/VII	?	N	Y	N
c18810_g1_5_2	MMLAQFWHVEVLYSFLVLIHLRCAARS		SRDQVSPPFLCRLPVFPQRQEQAVCDGGVTLTVARAVRLASARTPALRQPVLLAQSWPQRFDRCRCRMSLAFLPLQS		XIV	?	N	N	N
c11961_g1_6_5	MNCLQLLLVLLLISAIAALHG	DGRVPQRRGRNIR	TTSNLLNFQTRDCPSSCPAVCPNQNECCDGDVCNYSNTLNKYFCIGCGSGGGE		XIII	?	N	N	N
c7133_g1_5_1	MNMRMMLTVLIVVVFTRMALC	STEDGRLARQRR	GDTSAECCLTLLGCYNTCMLDHISSDCWEHCKSENTIQCSLDFSLYYCNSFQSCYQICIRTKHESHCFRGCKYEAMGDCLETGVVECCPGFMMCYNNCEHSHAYCMTHCTKGSC			?	N	N	N
c22526_g1_2_4	MNRMGFFLTLTVAVLLTSLICTDG	APAEKVDR	NDDCTGDCVTCDSALPCGCCGNVICHSSSGVCQHVSDTYNYYDSYY		XII	?	N	N	N
c25328_g1_1_2	MNVATFFKLKIHWFVPFFSFFIEYLYFVNA		FCCCCFFRGRRERRVCLVLQEFFFDWITDVTQLSVTPGTVVERKC			?	N	N	N
c31731_g1_5_8	MPCIFLLMVIWFFSLSP		DFYNYMKVCPSWRVSPSLTRAVDCNDLYLKCLKSCISCGSRIRHFVLVFGVLHIHVHV		XIV	?	N	N	N
c26537_g1_4_5	MPDILMEAATWLYWLMSTMAPSSSVWMSLSHWMRASTLA		LSTPSIVRSSSSLSPLRLEVGGGKPMKGGMKNGMDGPKGGGAAAEALALAEAEVLVVVVVVVAEEAVAPPVPGAPACCGGCPMAWPGRPPGCIGGQPKGNPPNP		I	?	N	N	N
c35511_g1_3_8	MPFILVPNTQPHAGALCSLFFASSQQEA		MRLPVTVRSSTRRGPARLSHGWIDLYSVSIYCDLTRNGFASRVLVVGY			?	N	N	N
c5091_g1_4_2	MPFSALLQPGSTAMVMLSITGGRLHG		KTSTMLSLINRFAVSMALPSDRMSCFLSSLNVFGLLTFSLSVSSSSK			?	N	N	N
c62550_g1_4_2	MPGLKLLISGCLASRWVTWWTLQVSSTSTWA		WTSGSSGLLHWWSGRCCTACA			?	N	N	N
c28654_g1_6_5	MPILSAAHFYQPLVCFQWLFCQYSLQ		TKITETATVNRSADGIAWYKDYAYGFHSKDLENSSTL			?	N	N	N
c51460_g1_5_8	MPLFMAVWVPLILGTFRKPGLHP		AIQPPGNVSLGILCSPPSLRARAP			?	N	N	N
c36129_g1_4_8	MPNSNSALALLILFTALLWVYRQ		FVCVYKCIINVYFECVFCMYILKSCWCCTKYFCAIIVSAYKTTIPNFVCTLPEVLHTALLKNCKEVKSMHLSFSVLPIFVLFITKLE	K		?	N	N	N
c43687_g1_4_4	MPRVGEGLPDWAGLVISGLLGSLTRLHT		IEPSGPHPSVLLFSPPSPSFSTACSTVN			?	N	N	N
c53192_g1_4_1	MPVYVYVCVLVYIWA		YTNVCVCVRARALCCSFAQCFVGYQLTSNVQEHFCNISIHATYCSKIAIMRVNWLKIL		VI/VII	?	N	N	N
c74354_g1_4_2	MQFCFRLSIFSLLIFLPRLIIIHVFG		SPVEEDMDSRYMQGMV			?	N	N	N
c19559_g1_6_4	MQFCYPFLFSSFSYVLPGVSEA		LSWNSLLSCGIYLSFFIFSFSSSRPFPSSLRNVLLKRAAFSWVSEAPSFTCRPKSDSRSFSSPSSPNSLPL			?	N	N	N
c31186_g1_1_7	MQKATVLILAILLLLPLSTA	QDDEGSQENAAER	ELAGTTDCGGTGESCGGSDDPDCCGLQKCVSGKCCPTTDAC	GR	XVII	?	N	N	Y
c30652_g1_3_2	MQLLFLYMPNTAALAFIVLALARPKVLA	LALR	SACCCCCSCDL	R		?	N	N	N
c50184_g1_6_5	MRLKSMIFFRILGLVSYLHGLGSS	NNTPHTIFNQVYLRLVLR	HCLTFLSLSVVAIKGSVTACGYKRSESPVKRAVSCTLHSCGDKAVFTNWDGDFFKSWSLYPFNAKETPLQQCCYISV		XXV	?	N	N	N
c65996_g1_5_1	MRLPARLYFGSPVIVDFLTA		FEFGLLITCCRFMCMCKRHVTRGTLCTVLKEESDHHTFCLTHSDVL	RTIYFFFIPEFTLFSLQ	IV	?	N	N	N
c21339_g1_5_2	MRNLAVFLCLLAIVGLSSA	YWIDGLYGNQLYDDEEAARMFSEHKR	RDLTKSQDLCIPWRAPCPSDAKLSERYPFLRCCSGLSCRCTFWGNNCKCESRL	GR	XV	?	N	Y	Y
c31526_g1_3_6	MRPGPAEEGTQLLLLLQLLLSGEDVVAVA		FCCSSCSCFFSSALASLESTCTSLVILISSPAKSNTLVMVIFPLLLPLD		I	?	N	N	N
c34331_g1_1_8	MRTIRALASFLHPLLP		LSPPPPCNKNNNKQTNSGQLKRIFFQIIIYPWHTCCINYTQAFREGRDELLFVLLHMVVSVEIEVLGVLDDDDGTGAVVDEIVADGSHESSTDSPQPP			?	N	N	N
c29191_g1_1_5	MRVFWVWRGGEGVCCGVYGCAVGVKG		ERCLKLLALVDAMILNKDVTL			?	N	N	N
c32085_g1_1_2	MSAAVLGLTVAVTVSA		ASLCILRSLPEYKRDRWSSNRALRASTSCCSSTVSSPAVAATASEALFFPAISSLSIRA	RKS		?	N	N	N
c19049_g1_1_6	MSILLICTSPVPLSPPPPILP		LPPTFPVFSSPEIPHLISLAAR			?	N	N	N
c34360_g1_5_3	MSKSGMVLFVLLLLLPLAFP	KLVPAGRSVARRYGNLGAK	REVPLTCHPPSTPNLNGPWQDQKCCLTKQCSPTNCCTSTSCVCDMSICDCSGM		XX	?	N	Y	N
c81116_g1_5_1	MSMFVPFTVPWLYVSVVCFLSSA		GDMTLCKQWTVRKVDASSSVY			?	N	N	N
c8738_g1_3_2	MSPQSKAILFLFFPPFFSSLHIFLLTCQS		GIFQYNVARDTFLVAMESLTSGSCPQNICIMRYAERLAPRPAFQV			?	N	N	N
c57806_g1_2_4	MSTLGMVLLVLLLLLPLGNS	DGDGDRQAMHRDHTAARARSASRLRLKSYMDHGRSADKR	CSTIVCGSKCCSSSDCTCGIVGSQSNEPSCSCPV	GRK	XV	?	N	Y	Y
c75527_g1_3_1	MSVFHCCWLVFVLSACVPLLLA		EFVQQVLIGWSLIPLPCHWLSSHTVQLNLWFNKTHCIITM			?	N	N	N
c28130_g2_5_13	MSVGFCFCWMLFLWCVVVCCCC		FNFSLLSQLTWRWEIMIFFFFIIIHVELKDWLVLFRFPNNVSVTDIASE			?	N	N	N
c73686_g1_3_1	MSYLTLLLFGFFTLVG		EPFQAGQYCRLFFVHFHLCCLGTCAVGFFVCM		I	?	N	N	N
c12886_g1_5_6	MTAVSSAPPFYPILIHALSAHFPVFA		LPSAPSILLPSPPPNLCPTFSYSVCPASSLFVPSLRYFRPPRLLPCLCLTFSLPFSLSVL		XIV	?	N	N	N
c38544_g2_4_2	MTDAHWPAPALGAPYTLSGLSSFRNCAAISAASSCSSSWA		ASIISSAICCLRCCLVSSVYAL		V	?	N	N	N
c36592_g1_1_5	MTIHMFPVSVLCVIVIVTPHFP		IPPRIARHDVTEKPFNKECPNKDQAWIFI			?	N	N	N
c19119_g1_3_18	MTIPVPSLFSVICCIICVVIYEPALQVLG		SHNQNIQPQYCVSSFSYDKWTKKPQMF			?	N	N	N
c6530_g1_4_1	MTLASSFILYVLRVIVIA		IDLMTLASSFILYVLRVIVIAIDLSAT			?	N	N	N
c37397_g1_4_9	MTTAACMVVSGFLSAAGTILA		NTGTRLLNLQLAKTLARIRNQTIMLTPL			?	N	N	N
c16131_g1_1_1	MTTFSMRSRLPGPGALLGFLSSEPPSSHC		HVLVPAAPCLARPLLLFGITV			?	N	N	N
c8941_g1_5_3	MTVSIFFSIAAYPLLLAGIVAVRS		LSFLSRSLTSFFSACLCAFLP			?	N	N	N
c15997_g1_6_14	MVAAVFCAVVVVVDA		DDGGSLLCCCCCCKVIKMECNDFLILRGFSYSYYSAILFFD			?	N	N	N
c40693_g1_6_2	MVALGMVAYAVMSFVVNHQVLA	EERRR	EEKDLTVLHSQRDGWEAGPYQKPCRPTLNVNYWGGVFCVCFLTECSHTNLIIFFTALDKHLKQGNWLFCFVFNLP		XIV	?	N	N	N
c50600_g1_1_1	MVDRSTALMTAVGLEGLLMPAAFSAMTLNSFSLPSARS		DTVYTVSRIGLLLTRVQREVVGDLRSTM			?	N	N	N
c56434_g1_2_1	MVDYFHILYFVVVVTTLGHS		LRFTFYFQHDKVCCFQNKLSDCICCCCLYYSPA			?	N	N	N
c37212_g2_4_12	MVFICSVCHMVFMLSGLSVVFVTDS		CPWCSYASFVALHPCCLASCPQPQPGPRPPAALAQAIHRKQFFCHVIMKHPPKETLQCCQVTSVVYSGTCFDPTFAGHHLQ			?	N	N	N
c14506_g1_1_11	MVGRLFPWSLAVVVHPPPRSTSSRLLCLLWQLCCPWRCCC		RRWVLAVAPPLWASALTGPPPPQTPSPHSASPHEI			?	N	N	N
c12361_g1_4_3	MVGRTSVSFLLFSIMILGMVATVIC		SCEERISSEKCEAPGERICSCSNHVCCQLSAAKKDQCMTPFMCRTASGGN	RRRRSTQVQDRFLRMARGLAD	XII	?	N	N	N
c19215_g1_3_8	MVIDCKINSFIMILYLYFMCTGVES		CSYSCEMYAFVPVTYLLGSEGIFSVFY	RKSVFDALDN		?	N	Y	N
c84051_g1_6_1	MVLGSDISFIFTPLTLSFIPTAIA		GFIFCQLHFRNDKFLFLPIFLSGCWKPSPCIFTSNFINHCECPSMLCFKSCVQIFIIYIYWP		IX	?	N	N	N
c35889_g1_5_20	MVMVVSALSLDPNLT	APLPFLTSTTHRPSFPPAPFTLKAYTPFIFFTMLLPSSSSRLAISLKRAADLKSLSEGPELVR	DAWICRPMVSGKPCW			?	N	N	N
c36213_g1_4_3	MVPILRKPTCCLSFLIILLPLVG		IYFPIASPSIPCSGFPSSTKNVDSFSIIHTF			?	N	N	N
c38931_g2_5_7	MVSVLLVHGSLGWSVHFIFPYSHFKSMEGIKPSSSLLHMMCIFRINRLLAWLLCFVFFSSHG		TECTNFVLCEGAACLMTVTSLSFHVRII			?	N	N	N
c65072_g1_1_1	MVVGVGQLLLLLFVVVVVTVVMVTDCCC		CHCCWFLPMCWS		XXIV	?	N	N	N
c32450_g1_1_5	MVYFLSLPEPTFAFAVPLTFFCLFFLSLRCFLPALFTSTNPCLA		SLYLGSKRLAFSGVS			?	N	N	N
c29146_g1_2_10	MVYSFIAIMILTCHFTDFLFDCCCC		HFHVHNTDYLKCVDRSRKPASANTISGNVKSVSVSVSVLCKHGIKEGCGILADASTEHARD	RRV		?	N	N	N
c25469_g1_2_9	MWKAVLMVLMVVVTFAVQTSP		QDVEGGTDGVDGCCYICCTDVTPGC	GRRY	V	?	Y	N	Y
c39240_g1_4_13	MWLLFVSFYVVFLFLVEQ		SNPIYFLIPTIHCLQAVFQVFCSPLPSPSPSPHFSALICCLTAVPVPLSHSVESCAMKAYCTDKSSFPSFFIMLLVYIIGA		VI/VII	?	N	N	N
c27187_g1_1_15	MWLTHSLQALALGYVYPSEAWYARC		LPLGIWYNLPTSTSPPSWELCCPLILCIA			?	N	N	N
c8042_g1_4_3	MWLVLFWMFDLMGHSFS		IYVSLFEVCCMQIICVSHQIPTFAFDLWTVS			?	N	N	N
c71737_g1_4_3	MWNMMVAAFVRPGVIWLFCYTLPSLSILLLFPPVNCWA		SFTTKDVWILHGGEV			?	N	N	N
c41769_g1_2_1	MWSGILVQVLASAPNFDWLPSHQSILA		LICCHEGCLSVLKRPCMRLVEL		I	?	N	N	N
c39216_g1_1_14	MWSITSGIFVCYISAIFSLGNASA		MPTNLHPHPHLRYAPPSLLPHLPRLPPHLFSLSMHSPIVYMHKIL			?	N	N	N
c35455_g2_5_12	MYFCCFSASCMPVQYMWPAFCAGLSWLLVTASVLSSLG		FTLGPFNSCDLLVCYRCFFPPFPSTVIN	KRHFHSAFIFPYIMAA		?	N	N	N
c38230_g1_4_21	MYKCEMLVLFVAYLHA		DMKVPHNSIGLLCCGHWCICMYRVCVCVCILSLSIYRDYRYICIYIYIYTYISIISIYRQ			?	N	N	N
c40245_g2_6_53	MYMPEMNFSYLCLPALIECLSTCLS		KSVVMKSKQPSSPNAPHSVLISISGGPGSLPSAISTLSSFSM			?	N	N	N
c18525_g1_3_6	MYMSMYLLLELFLFFLSAQGVCC		TEHLCDVCLMSARLYYPRPLFPLSVRCTC		XIV	?	N	N	N
c39572_g2_6_1	MYTLHTVFIFHLFLFVLPLHP		LPPPPSLFLGGRVWVGKVELINTRSYVDRRTFILLSLVSGNFSFNGEQDNQSLTGIDSRQPPAYTS			?	N	N	N
c40335_g1_2_2	MYVMYVFVHFICSLSSA		FFPVPLSRKLKPSLFSLFCFLLRFILKANFHHIGIIYSYAVYSLTMY			?	N	N	N

## Sheet: Table S3
Supplemental Table S3: Conopeptide precursors verified by LC-MS/MS.Yellow labels represent conopeptides that have been included in the Conosever.
Name	Signal sequence	Pre sequence	Mature sequence	Post sequence	Identified disulfide link Sites	Cysteine Framework	Gene Superfamily	Closest
Que-1-c61524_g2_4_1	MAMNVWMTISVLVVVVMATAVTG	STPSQEQERSSVDRTKK	SCCAMKTYECLRDRDCLISQDSDCATPCKNIDTSGCDSADGNDCCASYMDCVVDCQIDTGSDVEDPLAVCYNSCNSAHSC		C56(Carbamidomethyl) C64(Carbamidomethyl) C68(Carbamidomethyl)	-CC-C-C-C-C-C-CC-C-C-C-C-C
Que-2-c63954_g1_6_4	MQRGAVLLGVVAFLALWPQAAA	RVYDLNEPDVWGMVDYAQR	AMHSCAIVNDYDDRRWSSYNVAEFKDRSLFRTMVTDLQGCLNYFFQIRP		C81(Carbamidomethyl) C46(Carbamidomethyl)	-C-C-	F
Que-2-c19299_g2_2_1	MAMNVWMTISVLVVVVMATAVTG	STPSQEQERSSVDRTKK	SCCAMKTYECLRDRDCLISQDSDCATPCKNIDTSGCDSADGNDCCASYMDCVVDCQIDTGSDVEDPLAVCYNSCNSAHSC		C56(Carbamidomethyl) C64(Carbamidomethyl) C68(Carbamidomethyl) C50(Carbamidomethyl)	-CC-C-C-C-C-C-CC-C-C-C-C-C
Que-2-c53730_g1_3_6	MRCYVLLTVTLLLMWFSGGDA	GPRHAIGHFVRR	DCQTGCVGCNNRAGCCCGGQVCVDNNRCEAGS		C48(Carbamidomethyl) C49(Carbamidomethyl) C50(Carbamidomethyl) C55(Carbamidomethyl) C61(Carbamidomethyl)	-C-C-C-CCC-C-C-
Que-2-c58343_g1_2_2	MGMRMMFTMFLLVVLATTVVS	FTSDHASDGRNTAANDKASDLMALR	DGCCSNPSCSVNNPDICGG	GR	C49(Carbamidomethyl) C50(Carbamidomethyl) C55(Carbamidomethyl) C63(Carbamidomethyl)	-CC-C-C-	A	Qc1.18
Que-2-c57915_g1_5_6	MNCLQLLLVLLLISTIAA	LHGDGRVPQRRGRNIR	TMSNLLNFQTRDCPSSCPAVCPNQNECCDGDVCNYSNTLNKYFCIGCGSGGGE		C78(Carbamidomethyl) C81(Carbamidomethyl)	-C-C-CC-C-C-C-
Que-2-c67547_g1_6_5	MYIHIHFSLVLSFSIPPPSLS		LFLQSSPFLFCSRICAVYCVEMFERFQI		C36(Carbamidomethyl) C40(Carbamidomethyl)	-C-C-
Que-3-c49057_g1_1_1	MKLTGVLIISVLLLTASQLITA	DYSRDKRQYLAMRLRDGMRNFRGVR	DCGEQGEGCRTRPCCSGLSCIGTHAGGLCQPE		C61(Carbamidomethyl) C62(Carbamidomethyl) C67(Carbamidomethyl) C76(Carbamidomethyl)	-C-C-CC-C-C-
Que-3-c37676_g1_3_6	MMSKLGVLLTICLLLFPLTA	LPLDGDQPADQSAERPAERTQDDIQQHPLYDPKR	GCCVYPCLGSCRGICCYN		C56(Carbamidomethyl) C57(Carbamidomethyl) C61(Carbamidomethyl) C65(Carbamidomethyl) C69(Carbamidomethyl) C70(Carbamidomethyl)	-CC-C-C-CC-	M
Que-3-c57806_g1_2_4	MSTLGMVLLVLLLLLPLGNS		DGDGDRQAMHRDHTAARARSASRLRLKSYMDHGRSADKRCSTIVCGSKCCSSSDCTCGIVGSQSNEPSCSCPV	GRK	C60(Carbamidomethyl) C65(Carbamidomethyl)
Que-3-c11961_g1_6_5	MNCLQLLLVLLLISAIAALHG	DGRVPQRRGRNIR	TTSNLLNFQTRDCPSSCPAVCPNQNECCDGDVCNYSNTLNKYFCIGCGSGGGE		C78(Carbamidomethyl) C81(Carbamidomethyl)	-C-C-C-CC-C-C-C-
Que-3-c39769_g2_3_2	MGMRMMFTMFLLVVLATTVVS	FTSDHASDGRNTAANDKASDLMALR	DGCCSNPSCSVNNPDICGG	GR		-CC-C-C-	A	Qc1.18
Que-3-c57791_g1_4_1	MAMNVWMTISVLVVVVMATAVTG	STPSQEQERSSVDRTKK	SCCAMKTYECLRDRDCLISQDSDCATPCKNIDTSGCDSADGNDCCASYMDCVVDCQIDTGSDVEDPLAVCYNSCNSAHSC		C50(Carbamidomethyl) C56(Carbamidomethyl) C64(Carbamidomethyl) C68(Carbamidomethyl)	-CC-C-C-C-C-C-CC-C-C-C-C-C
